# Supplementary material
Source: ML conference proceedings conference paper supplement (https://proceedings.neurips.cc/paper_files/paper/2019/hash/65fc52ed8f88c81323a418ca94cec2ed-Abstract.html)
Supplement: Supplementary file [file 65fc52ed8f88c81323a418ca94cec2ed-Supplemental.zip]

---

# Supplementary Material for Paper “The Landscape of Non-convex Empirical Risk with Degenerate Population Risk”

---

**Shuang Li, Gongguo Tang, and Michael B. Wakin**

Department of Electrical Engineering

Colorado School of Mines

Golden, CO 80401

{shuangli, gtang, mwakin}@mines.edu

## A Proof of Theorem 2.1

To prove Theorem 2.1, we need the following two lemmas, which are extensions of [1, Lemmas 5, 7].

**Lemma A.1.** *Let  $\mathcal{M}$  be a general Riemannian manifold and  $\mathcal{E} \subseteq \mathcal{M}$  be a connected and compact set with a  $\mathcal{C}^2$  boundary  $\partial\mathcal{E}$ . Denote  $f, g : \mathcal{A}_o \rightarrow \mathbb{R}$  as two  $\mathcal{C}^2$  functions defined on an open set  $\mathcal{A}_o$  with  $\mathcal{E} \subseteq \mathcal{A}_o \subseteq \mathcal{M}$ . With the following assumptions:*

- For all  $\mathbf{x} \in \partial\mathcal{E}$  and  $t \in [0, 1]$ ,

$$t \text{grad } f(\mathbf{x}) + (1 - t) \text{grad } g(\mathbf{x}) \neq \mathbf{0}. \quad (\text{A.1})$$

- The Hessians of  $f$  and  $g$  are close, i.e.,

$$\|\text{hess } f(\mathbf{x}) - \text{hess } g(\mathbf{x})\|_2 \leq \frac{\eta}{2}. \quad (\text{A.2})$$

- For all  $\mathbf{x} \in \mathcal{E}$ , the minimal eigenvalue of  $\text{hess } g(\mathbf{x})$  satisfies

$$|\lambda_{\min}(\text{hess } g(\mathbf{x}))| \geq \eta. \quad (\text{A.3})$$

Then, we have the following statements hold:

- (a) Both  $g$  and  $f$  have at most a finite number of local minima in  $\mathcal{E}$ . Furthermore, if  $g$  has  $K$  ( $K = 0, 1, 2, \dots$ ) local minima in  $\mathcal{E}$ , then  $f$  also has  $K$  local minima in  $\mathcal{E}$ .
- (b) If  $g$  has a strict saddle in  $\mathcal{E}$ , then if  $f$  has any critical points in  $\mathcal{E}$ , they must be strict saddle points.

The proof of Lemma A.1 is given in Appendix B.

The following lemma is a parallel result of [1, Lemma 7] for the case when

$$\lambda_{\min}(\text{hess } g(\mathbf{x})) \geq \eta, \quad \lambda_{\min}(\text{hess } f(\mathbf{x})) \geq \frac{\eta}{2},$$

and can be proved similarly.

**Lemma A.2.** *Denote  $\mathcal{B}(l)$  as a compact and connected subset in a general manifold  $\mathcal{M}$  with  $l$  being its parameters.<sup>1</sup> Let  $g : \mathcal{B}(l) \rightarrow \mathbb{R}$  be a  $\mathcal{C}^2$  function satisfying  $\lambda_{\min}(\text{hess } g(\mathbf{x})) \geq \eta$  in  $\overline{\mathcal{D}}$  with*

---

<sup>1</sup>The subset  $\mathcal{B}(l)$  can vary in different applications. For example, we define  $\mathcal{B}(l) \triangleq \{\mathbf{U} \in \mathbb{R}_*^{N \times k} : \|\mathbf{U}\mathbf{U}^\top\|_F \leq l\}$  in matrix sensing and  $\mathcal{B}(l) \triangleq \{\mathbf{x} \in \mathbb{R}^N : \|\mathbf{x}\|_2 \leq l\}$  in phase retrieval.

$\overline{\mathcal{D}} \triangleq \{\mathbf{x} \in \mathcal{B}(l) : \|\text{grad } g(\mathbf{x})\|_2 \leq \epsilon\}$ . Denote  $\mathbf{x}_1, \mathbf{x}_2, \dots, \mathbf{x}_K$  as the local minima of function  $g$ . Then, there exist disjoint compact sets  $\{\mathcal{D}_i\}_{i \in \mathbb{N}}$  such that

$$\overline{\mathcal{D}} = \bigcup_{i=1}^{\infty} \mathcal{D}_i$$

with each maximal connected component  $\mathcal{D}_i$  containing at most one local minimum. Namely,  $\mathbf{x}_i \in \mathcal{D}_i$  for  $1 \leq i \leq K$ , and  $\mathcal{D}_i$  with  $i \geq K+1$  contains no local minima.

Now, we are ready to prove Theorem 2.1. Denote  $\mathbf{x}_1, \dots, \mathbf{x}_K$  as the  $K$  local minima of  $g(\mathbf{x})$ . Define  $\overline{\mathcal{D}} \triangleq \{\mathbf{x} \in \mathcal{B}(l) : \|\text{grad } g(\mathbf{x})\|_2 \leq \epsilon\}$ . By applying Lemma A.2, we can partition  $\overline{\mathcal{D}}$  as  $\overline{\mathcal{D}} = \bigcup_{i=1}^{\infty} \mathcal{D}_i$ , where each  $\mathcal{D}_i$  is a disjoint connected component containing at most one local minimum. Explicitly,  $\mathbf{x}_i \in \mathcal{D}_i$  for  $1 \leq i \leq K$ , and  $\mathcal{D}_i$  with  $i \geq K+1$  contains no local minima. We also have  $\|\text{grad } g(\mathbf{x})\|_2 = \epsilon$  for  $\mathbf{x} \in \partial \mathcal{D}_i$  by the continuity of  $\text{grad } g(\mathbf{x})$ .

Hereafter, we assume the two Assumptions 2.2 and 2.3 hold. It follows from (2.2) that

$$\sup_{\mathbf{x} \in \partial \mathcal{D}_i} \|\text{grad } f(\mathbf{x}) - \text{grad } g(\mathbf{x})\|_2 \leq \frac{\epsilon}{2}.$$

Then, for  $\forall t \in [0, 1]$ , we have

$$\sup_{\mathbf{x} \in \partial \mathcal{D}_i} t \|\text{grad } f(\mathbf{x}) - \text{grad } g(\mathbf{x})\|_2 \leq \frac{\epsilon}{2},$$

which is equivalent to

$$\epsilon - \sup_{\mathbf{x} \in \partial \mathcal{D}_i} t \|\text{grad } f(\mathbf{x}) - \text{grad } g(\mathbf{x})\|_2 \geq \frac{\epsilon}{2}, \quad \forall t \in [0, 1].$$

Recall that  $\|\text{grad } g(\mathbf{x})\|_2 = \epsilon$  for  $\mathbf{x} \in \partial \mathcal{D}_i$ . Then, we have

$$\inf_{\mathbf{x} \in \partial \mathcal{D}_i} \|\text{grad } g(\mathbf{x})\|_2 - \sup_{\mathbf{x} \in \partial \mathcal{D}_i} t \|\text{grad } f(\mathbf{x}) - \text{grad } g(\mathbf{x})\|_2 \geq \frac{\epsilon}{2}, \quad \forall t \in [0, 1],$$

which further gives us

$$\inf_{\mathbf{x} \in \partial \mathcal{D}_i} \{\|\text{grad } g(\mathbf{x})\|_2 - t \|\text{grad } f(\mathbf{x}) - \text{grad } g(\mathbf{x})\|_2\} \geq \frac{\epsilon}{2}, \quad \forall t \in [0, 1].$$

Consequently, we obtain

$$\inf_{\mathbf{x} \in \partial \mathcal{D}_i} \|(1-t)\text{grad } g(\mathbf{x}) + t\text{grad } f(\mathbf{x})\|_2 \geq \frac{\epsilon}{2}, \quad \forall t \in [0, 1].$$

Let  $\mathcal{D}$  in the statement of Theorem 2.1 be one of the  $\mathcal{D}_i$ s. Then  $\mathcal{D}$  contains at most one local minimum. The rest of Theorem 2.1 follows from Lemma A.1.

## B Proof of Lemma A.1

Using the Nash embedding theorem [2], we first embed the Riemannian manifold  $\mathcal{M}$  isometrically into a Euclidean space  $\mathbb{R}^N$  for sufficiently large  $N$ . This allows us to view  $\mathcal{M}$  as a Riemannian submanifold of  $\mathbb{R}^N$  and identify the tangent spaces of  $\mathcal{M}$  as subspaces of  $\mathbb{R}^N$ . We also identify the norm  $\|\cdot\|_2$  induced by the Riemannian metric with the Euclidean norm in  $\mathbb{R}^N$ . Recall that  $\mathcal{E}$  is a connected set. Then, assumption (A.3) implies that any point  $\mathbf{x} \in \mathcal{E}$  satisfy either  $\lambda_{\min}(\text{hess } g(\mathbf{x})) \geq \eta$  or  $\lambda_{\min}(\text{hess } g(\mathbf{x})) \leq -\eta$ . There cannot exist two points  $\mathbf{x}_1, \mathbf{x}_2 \in \mathcal{E}$  such that  $\lambda_{\min}(\text{hess } g(\mathbf{x}_1)) \geq \eta$  and  $\lambda_{\min}(\text{hess } g(\mathbf{x}_2)) \leq -\eta$ . Otherwise, since the continuous image of any connected set must also be a connected set, there must exist another point  $\mathbf{x}_3 \in \mathcal{E}$  such that  $-\eta < \lambda_{\min}(\text{hess } g(\mathbf{x}_3)) < \eta$ , which contradicts assumption (A.3).

Note that

$$|\lambda_{\min}(\text{hess } f(\mathbf{x})) - \lambda_{\min}(\text{hess } g(\mathbf{x}))| \leq \|\text{hess } f(\mathbf{x}) - \text{hess } g(\mathbf{x})\|_2 \leq \frac{\eta}{2},$$

where the first inequality follows from [3, Theorem 5] and the last inequality follows from assumption (A.2). Together with the assumption (A.3), we obtain

$$\begin{cases} \lambda_{\min}(\text{hess } f(\mathbf{x})) \geq \frac{\eta}{2}, & \text{if } \lambda_{\min}(\text{hess } g(\mathbf{x})) \geq \eta, \\ \lambda_{\min}(\text{hess } f(\mathbf{x})) \leq -\frac{\eta}{2}, & \text{if } \lambda_{\min}(\text{hess } g(\mathbf{x})) \leq -\eta. \end{cases} \quad (\text{B.1})$$

1) When  $\lambda_{\min}(\text{hess } g(\mathbf{x})) \geq \eta$  for all  $\mathbf{x} \in \mathcal{E}$ , we have  $\lambda_{\min}(\text{hess } f(\mathbf{x})) \geq \frac{\eta}{2}$  for all  $\mathbf{x} \in \mathcal{E}$ . This implies that the critical points of  $g(\mathbf{x})$  and  $f(\mathbf{x})$  in  $\mathcal{E}$  are all local minima and are all isolated. Since  $\mathcal{E}$  is a compact set, there can only exist a finite number of critical points of  $g(\mathbf{x})$  and  $f(\mathbf{x})$  in  $\mathcal{E}$ , which are denoted as  $\mathbf{x}_1, \mathbf{x}_2, \dots, \mathbf{x}_K$  and  $\hat{\mathbf{x}}_1, \hat{\mathbf{x}}_2, \dots, \hat{\mathbf{x}}_{\hat{K}}$ , respectively.

For  $\epsilon > 0$  small enough, define a set

$$\mathcal{E}_{-\epsilon} \triangleq \{\mathbf{x} \in \mathcal{E} : d(\mathbf{x}, \mathcal{E}^c) \geq \epsilon\},$$

where  $d(\mathbf{x}, \mathcal{S}) \triangleq \inf\{\|\mathbf{x} - \mathbf{y}\|_2 : \mathbf{y} \in \mathcal{S}\}$  is the distance between  $\mathbf{x}$  and a set  $\mathcal{S}$ . Define  $w : \mathcal{A}_o \rightarrow [0, 1]$  as a  $\mathcal{C}^1$  bump function with

$$w(\mathbf{x}) = \begin{cases} 0, & \mathbf{x} \in \mathcal{A}_o \setminus \mathcal{E}, \\ 1, & \mathbf{x} \in \mathcal{E}_{-\epsilon}. \end{cases}$$

Define two  $\mathcal{C}^1$  vector fields as

$$\begin{aligned} \xi_0(\mathbf{x}) &= \text{grad } g(\mathbf{x}), \\ \xi_1(\mathbf{x}) &= (1 - w(\mathbf{x}))\text{grad } g(\mathbf{x}) + w(\mathbf{x})\text{grad } f(\mathbf{x}). \end{aligned}$$

Note that  $\xi_0|_{\partial\mathcal{E}} = \xi_1|_{\partial\mathcal{E}}$  since  $w(\mathbf{x}) = 0$  when  $\mathbf{x} \in \partial\mathcal{E}$ . With assumption (A.1), we have

$$\inf_{\mathbf{x} \in \partial\mathcal{E}} \inf_{t \in [0,1]} \|(1-t)\text{grad } g(\mathbf{x}) + t\text{grad } f(\mathbf{x})\|_2 > 0$$

by a continuity argument. Then, we can choose  $\epsilon > 0$  small enough such that

$$\xi_1(\mathbf{x}) \neq 0, \quad \text{hess } f(\mathbf{x}) \neq 0$$

holds for all  $\mathbf{x} \in \mathcal{E} \setminus \mathcal{E}_{-\epsilon}$ . This implies that the critical points of  $\xi_1$ <sup>2</sup> are all in  $\mathcal{E}_{-\epsilon}$  and coincide with the critical points of  $f$  since  $\xi_1(\mathbf{x}) = \text{grad } f(\mathbf{x})$  in  $\mathcal{E}_{-\epsilon}$ . Therefore,  $\hat{\mathbf{x}}_1, \hat{\mathbf{x}}_2, \dots, \hat{\mathbf{x}}_{\hat{K}}$  are also the critical points of  $\xi_1$  in  $\mathcal{E}_{-\epsilon}$ .

For a non-degenerate critical point  $\mathbf{x}_0$  of a smooth vector field  $\xi : \mathcal{E} \rightarrow \mathbb{R}^{\bar{N}}$ , we define the index of  $\mathbf{x}_0$  as the sign of the Jacobian determinant [1, 4], namely

$$\text{ind}_{\mathbf{x}_0}(\xi) = \text{sign } \det(D\xi_{\mathbf{x}_0}), \quad (\text{B.2})$$

where  $D\xi_{\mathbf{x}_0} : T_{\mathbf{x}_0}\mathcal{M} \rightarrow \mathbb{R}^{\bar{N}}$  is the differential of the vector field. Note that the map  $D\xi_{\mathbf{x}_0}$  can be considered as a linear transformation from  $T_{\mathbf{x}_0}\mathcal{M}$  to itself and hence has a well-defined determinant. When  $\xi$  is the Riemannian gradient, the differential  $D\xi_{\mathbf{x}_0}$  reduces to the Riemannian Hessian [5, Definition 5.5.1 and equation (5.15)].

Since  $\lambda_{\min}(\text{hess } g(\mathbf{x})) \geq \eta$  and  $\lambda_{\min}(\text{hess } f(\mathbf{x})) \geq \frac{\eta}{2}$ , both  $\text{hess } g(\mathbf{x})$  and  $\text{hess } f(\mathbf{x})$  are non-degenerate matrices whose determinants are positive. Recall that  $\xi_1(\mathbf{x}) = \text{grad } f(\mathbf{x})$  when  $\mathbf{x} \in \mathcal{E}_{-\epsilon}$ . Then, for  $1 \leq i \leq \hat{K}$ , we have

$$\text{ind}_{\hat{\mathbf{x}}_i}(\xi_1) = \text{sign } \det(D(\xi_1)_{\hat{\mathbf{x}}_i}) = \text{sign } \det(\text{hess } f(\hat{\mathbf{x}}_i)) = 1.$$

Define  $\hat{\xi}(\mathbf{x}) \triangleq \xi(\mathbf{x})/\|\xi(\mathbf{x})\|_2$  wherever  $\xi(\mathbf{x}) \neq \mathbf{0}$  as the Gauss map. Denote  $\mathbf{x}_1, \mathbf{x}_2, \dots, \mathbf{x}_K$  as the critical points of function  $g$  in  $\mathcal{E}$ . It follows from [1, Lemma 6], [6, Theorem 1.1.2], and [4, Theorem 14.4.4] that the sum of indices of the critical points inside  $\mathcal{E}$  is equal to the degree of the Gauss map restricted to the boundary of  $\mathcal{E}$ , hence, we have

$$\begin{aligned} \hat{K} &= \sum_{i=1}^{\hat{K}} \text{ind}_{\hat{\mathbf{x}}_i}(\xi_1) = \deg(\hat{\xi}_1|_{\partial\mathcal{E}}) \stackrel{\textcircled{1}}{=} \deg(\hat{\xi}_0|_{\partial\mathcal{E}}) \\ &= \sum_{i=1}^K \text{ind}_{\mathbf{x}_i}(\xi_0) \stackrel{\textcircled{2}}{=} \sum_{i=1}^K \text{sign } \det(D(\xi_0)_{\mathbf{x}_i}) \\ &= \sum_{i=1}^K \text{sign } \det(\text{hess } g(\mathbf{x}_i)) = K, \end{aligned}$$

<sup>2</sup>For a smooth vector field  $\xi : \mathcal{E} \rightarrow T\mathcal{M}$ , defined on  $\mathcal{E} \subseteq \mathcal{M}$ , a critical point is defined as a point  $\mathbf{x}_0 \in \mathcal{E}$  satisfying  $\xi(\mathbf{x}_0) = \mathbf{0}$ . Here  $T\mathcal{M}$  is the tangent bundle of  $\mathcal{M}$ .

where  $\deg(\widehat{\xi}|_{\partial\mathcal{E}})$  denotes the degree of the Gauss map restricted to the boundary of  $\mathcal{E}$ . Here, ① follows from  $\xi_0|_{\partial\mathcal{E}} = \xi_1|_{\partial\mathcal{E}}$  and ② follows from (B.2). Then, we can conclude that the number of critical points of  $f$  and  $g$  are both equal to  $K = \widehat{K}$ . Since the minimal eigenvalues of  $g$  and  $f$  are both positive, the critical points are also local minima. Thus, we finish the proof for first part of Lemma A.1.

2) When  $\lambda_{\min}(\text{hess } g(\mathbf{x})) \leq -\eta$ , we have  $\lambda_{\min}(\text{hess } f(\mathbf{x})) \leq -\frac{\eta}{2}$ . This immediately implies the second part of Lemma A.1.

## C Proof of Corollary 2.1

Let  $\{\widehat{\mathbf{x}}_k\}_{k=1}^K$  and  $\{\mathbf{x}_k\}_{k=1}^K$  denote the local minima of the empirical risk  $f$  and its population risk  $g$ . Recall that  $\overline{\mathcal{D}} = \{\mathbf{x} \in \mathcal{B}(l) : \|\text{grad } g(\mathbf{x})\|_2 \leq \epsilon\}$ . Using Lemma A.2, we partition  $\overline{\mathcal{D}}$  as  $\overline{\mathcal{D}} = \cup_{k=1}^{\infty} \mathcal{D}_k$  with  $\mathbf{x}_k, \widehat{\mathbf{x}}_k \in \mathcal{D}_k$  for  $1 \leq k \leq K$ , and  $\mathcal{D}_k$  for  $k \geq K+1$  contains no local minima.

Fix  $k \in \{1, 2, \dots, K\}$ . Let  $\mathcal{T}_{\mathbf{x}_k}\mathcal{M}$  be the tangent space of the Riemannian manifold  $\mathcal{M}$  at  $\mathbf{x}_k$  and  $\mathbf{0}_{\mathbf{x}_k}$  be the zero vector of  $\mathcal{T}_{\mathbf{x}_k}\mathcal{M}$ . Let  $\text{Exp}_{\mathbf{x}_k} : \mathcal{T}_{\mathbf{x}_k}\mathcal{M} \rightarrow \mathcal{M}$  denote the *exponential map* at  $\mathbf{x}_k$ . Suppose  $\widehat{\mathcal{N}}_{\mathbf{x}_k}$  is an open ball in  $\mathcal{T}_{\mathbf{x}_k}\mathcal{M}$  around  $\mathbf{0}_{\mathbf{x}_k}$  with radius  $\rho$ , the injectivity radius of  $\mathcal{M}$ . Then  $\text{Exp}_{\mathbf{x}_k}$  is a diffeomorphism in  $\widehat{\mathcal{N}}_{\mathbf{x}_k}$  [5, pp.148-149]. Define  $\mathcal{N}_{\mathbf{x}_k} \triangleq \text{Exp}_{\mathbf{x}_k}(\widehat{\mathcal{N}}_{\mathbf{x}_k})$  as the image of  $\widehat{\mathcal{N}}_{\mathbf{x}_k}$  under the exponential map  $\text{Exp}_{\mathbf{x}_k}$ . Then the Riemannian distance

$$\text{dist}(\mathbf{z}_1, \mathbf{z}_2) = \|\text{Exp}_{\mathbf{x}_k}^{-1}(\mathbf{z}_1) - \text{Exp}_{\mathbf{x}_k}^{-1}(\mathbf{z}_2)\|_2, \forall \mathbf{z}_1, \mathbf{z}_2 \in \mathcal{N}_{\mathbf{x}_k}$$

is equivalent to the distance in the tangent space (induced by the Riemannian metric) [5, Section 4.5.1]. The corollary's assumptions ensure in particular that  $\widehat{\mathbf{x}}_k \in \mathcal{D}_k \subseteq \mathcal{N}_{\mathbf{x}_k}$ . We next bound the radius of the set  $\mathcal{D}_k$ .

Consider the *pullback*  $\widehat{g} = g \circ \text{Exp}_{\mathbf{x}_k} : \mathcal{T}_{\mathbf{x}_k}\mathcal{M} \rightarrow \mathbb{R}$  that “pulls back” the cost function  $g$  from the manifold  $\mathcal{M}$  to the vector space  $\mathcal{T}_{\mathbf{x}_k}\mathcal{M}$ . Since the exponential map is a retraction of at least second-order, the gradient and Hessian of the pullback<sup>3</sup> satisfy [7, Proposition 2.11, Corollary 2.13]

$$\nabla \widehat{g}(\mathbf{0}_{\mathbf{x}_k}) = \text{grad } g(\mathbf{x}_k) = \mathbf{0}_{\mathbf{x}_k}, \quad \nabla^2 \widehat{g}(\mathbf{0}_{\mathbf{x}_k}) = \text{hess } g(\mathbf{x}_k).$$

This together with the Lipschitz Hessian condition imply that [8, Lemma 1]

$$\|\nabla \widehat{g}(\mathbf{v}) - \text{hess } g(\mathbf{x}_k)[\mathbf{v}]\|_2 = \|\nabla \widehat{g}(\mathbf{v}) - \nabla \widehat{g}(\mathbf{0}_{\mathbf{x}_k}) - \nabla^2 \widehat{g}(\mathbf{0}_{\mathbf{x}_k})[\mathbf{v}]\|_2 \leq \frac{L_H}{2} \|\mathbf{v}\|_2^2.$$

Since  $\lambda_{\min}(\text{hess } g(\mathbf{x}_k)) \geq \eta$ , we conclude

$$\|\nabla \widehat{g}(\mathbf{v})\|_2 \geq \|\text{hess } g(\mathbf{x}_k)[\mathbf{v}]\|_2 - \frac{L_H}{2} \|\mathbf{v}\|_2^2 \geq \eta \|\mathbf{v}\|_2 - \frac{L_H}{2} \|\mathbf{v}\|_2^2. \quad (\text{C.1})$$

Since the gradient of the pullback  $\widehat{g}$  at  $\mathbf{v}$  and the Riemannian gradient of  $g$  at  $\text{Exp}_{\mathbf{x}_k}(\mathbf{v})$  satisfy [9, Lemma 5.2]

$$\nabla \widehat{g}(\mathbf{v}) = (\text{DExp}_{\mathbf{x}_k}(\mathbf{v}))^* [\text{grad } g(\text{Exp}_{\mathbf{x}_k}(\mathbf{v}))],$$

where the differential  $\text{DExp}_{\mathbf{x}_k}(\mathbf{v})$  is a linear operator mapping vectors from the tangent space at  $\mathbf{x}_k$  to the tangent space at  $\text{Exp}_{\mathbf{x}_k}(\mathbf{v})$ , and the star indicates the adjoint, the corollary's assumptions imply

$$\|\nabla \widehat{g}(\mathbf{v})\|_2 \leq \|\text{DExp}_{\mathbf{x}_k}(\mathbf{v})\| \|\text{grad } g(\text{Exp}_{\mathbf{x}_k}(\mathbf{v}))\|_2 \leq \sigma \|\text{grad } g(\text{Exp}_{\mathbf{x}_k}(\mathbf{v}))\|_2.$$

Combining this with (C.1) yields

$$\|\text{grad } g(\text{Exp}_{\mathbf{x}_k}(\mathbf{v}))\|_2 \geq \frac{\eta}{\sigma} \|\mathbf{v}\|_2 - \frac{L_H}{2\sigma} \|\mathbf{v}\|_2^2. \quad (\text{C.2})$$

Define  $\widetilde{\mathcal{D}}_k \triangleq \{\mathbf{x} = \text{Exp}_{\mathbf{x}_k}(\mathbf{v}) \in \mathcal{N}_{\mathbf{x}_k} : \frac{\eta}{\sigma} \|\mathbf{v}\|_2 - \frac{L_H}{2\sigma} \|\mathbf{v}\|_2^2 \leq \epsilon\}$ . It follows from (C.2) that  $\mathcal{D}_k \subseteq \widetilde{\mathcal{D}}_k$ . Let  $r_0 = \frac{\eta - \sqrt{\eta^2 - 2\sigma L_H \epsilon}}{L_H}$  and  $r_1 = \frac{\eta + \sqrt{\eta^2 - 2\sigma L_H \epsilon}}{L_H}$ . For  $\epsilon \leq \eta^2/(2\sigma L_H)$ , we have

<sup>3</sup>Since the pullback is defined on a vector space, its gradient and Hessian can be computed using the regular  $\nabla$  and  $\nabla^2$  operators with appropriate choice of basis for  $\mathcal{T}_{\mathbf{x}_k}\mathcal{M}$ . Our notation highlights this fact.

$\tilde{\mathcal{D}}_k = \mathcal{B}(r_0) \cup \mathcal{B}(r_1)^c$  with  $\mathcal{B}(r_1)^c$  being the complement of  $\mathcal{B}(r_1)$ . Here  $\mathcal{B}(r_0) = \{\mathbf{x} = \text{Exp}_{\mathbf{x}_k}(\mathbf{v}) : \|\mathbf{v}\|_2 \leq r_0\} = \{\mathbf{x} \in \mathcal{M} : \text{dist}(\mathbf{x}, \mathbf{x}_k) \leq r_0\}$ . Note that since  $\mathcal{D}_k$  is connected and  $\mathbf{x}_k \in \mathcal{D}_k \cap \mathcal{B}(r_0)$ , we then have  $\mathcal{D}_k \subseteq \mathcal{B}(r_0)$ , which together with  $\hat{\mathbf{x}}_k \in \mathcal{D}_k$  further indicates that

$$\text{dist}(\hat{\mathbf{x}}_k, \mathbf{x}_k) \leq r_0 \leq 2\sigma\epsilon/\eta,$$

where the last inequality follows from  $\epsilon \leq \eta^2/(2\sigma L_H)$  and the elementary inequality  $\sqrt{1-x} \geq 1-x$  for  $x \in [0, 1]$ . This completes the proof since  $k \in \{1, 2, \dots, K\}$  is arbitrary.

## D Proof of Lemma 3.1

We present the Riemannian gradient and Hessian of population risk on the quotient manifold  $\mathcal{M}$  as follows

$$\text{grad } g(\mathbf{U}) = \mathcal{P}_{\mathbf{U}}(\nabla g(\mathbf{U})) = (\mathbf{U}\mathbf{U}^\top - \mathbf{X})\mathbf{U}$$

$$\text{hess } g(\mathbf{U})[\mathbf{D}, \mathbf{D}] = \langle \mathcal{P}_{\mathbf{U}}(\nabla^2 g(\mathbf{U})[\mathbf{D}]), \mathbf{D} \rangle = \nabla^2 g(\mathbf{U})[\mathbf{D}, \mathbf{D}] - \langle \mathbf{U}\boldsymbol{\Omega}, \mathbf{D} \rangle = \nabla^2 g(\mathbf{U})[\mathbf{D}, \mathbf{D}]$$

for any  $\mathbf{D} \in \mathcal{H}_{\mathbf{U}}\mathcal{M}$ . Here,  $\langle \mathbf{U}\boldsymbol{\Omega}, \mathbf{D} \rangle = \langle \boldsymbol{\Omega}, \mathbf{U}^\top \mathbf{D} \rangle = 0$  follows from the fact that  $\boldsymbol{\Omega}$  is a skew-symmetric matrix and  $\mathbf{D}^\top \mathbf{U} = \mathbf{U}^\top \mathbf{D}$ .

### D.1 Determining critical points

By setting  $\text{grad } g(\mathbf{U}) = \mathbf{0}$ , we get  $\mathbf{X}\mathbf{U} = \mathbf{U}\mathbf{U}^\top \mathbf{U}$ . Denote  $\mathbf{U} = \mathbf{W}_u \boldsymbol{\Lambda}_u^{\frac{1}{2}} \mathbf{Q}^\top$  as an SVD of  $\mathbf{U}$  with  $\mathbf{W}_u \in \mathbb{R}^{N \times k}$ ,  $\boldsymbol{\Lambda}_u \in \mathbb{R}^{k \times k}$  and  $\mathbf{Q} \in \mathbb{R}^{k \times k}$ . It follows from  $\mathbf{X}\mathbf{U} = \mathbf{U}\mathbf{U}^\top \mathbf{U}$  that

$$\mathbf{X}\mathbf{W}_u \boldsymbol{\Lambda}_u^{\frac{1}{2}} \mathbf{Q}^\top = \mathbf{W}_u \boldsymbol{\Lambda}_u^{\frac{3}{2}} \mathbf{Q}^\top,$$

which further gives us

$$\mathbf{X}\mathbf{W}_u = \mathbf{W}_u \boldsymbol{\Lambda}_u.$$

For  $i = 1, \dots, k$ , denote  $\mathbf{w}_{ui}$  and  $\lambda_{ui}$  as the  $i$ -th column of  $\mathbf{W}_u$  and  $i$ -th diagonal entry of  $\boldsymbol{\Lambda}_u$ , respectively. Then, we have

$$\mathbf{X}\mathbf{w}_{ui} = \lambda_{ui}\mathbf{w}_{ui},$$

which implies that  $\lambda_{ui}$  is one of the eigenvalues of  $\mathbf{X}$  and  $\mathbf{w}_{ui}$  is the corresponding eigenvector. Therefore, any  $\mathbf{U} \in \mathcal{U}$  is a critical point of  $g(\mathbf{U})$  and we finish the proof of property (1).

### D.2 Strongly convexity in region $\mathcal{R}_1$

Recall that  $\mathbf{U}^* = \mathbf{W}_k \boldsymbol{\Lambda}_k^{\frac{1}{2}} \mathbf{Q}^\top$  with  $\boldsymbol{\Lambda}_k = \text{diag}([\lambda_1, \dots, \lambda_k])$  containing the largest  $k$  eigenvalues of  $\mathbf{X}$ . It follows from the Eckart-Young-Mirsky theorem [10] that any  $\mathbf{U}^* \in \mathcal{U}^*$  is a global minimum of  $g(\mathbf{U})$ . Note that we can rewrite  $\mathbf{X}$  as

$$\mathbf{X} = \mathbf{W}_k \boldsymbol{\Lambda}_k \mathbf{W}_k^\top + \mathbf{W}_k^\perp \boldsymbol{\Lambda}_k^\perp \mathbf{W}_k^{\perp\top} = \mathbf{U}^* \mathbf{U}^{*\top} + \mathbf{W}_k^\perp \boldsymbol{\Lambda}_k^\perp \mathbf{W}_k^{\perp\top}, \quad (\text{D.1})$$

where  $\mathbf{W}_k^\perp \in \mathbb{R}^{N \times (r-k)}$  is a matrix that contains eigenvectors of  $\mathbf{X}$  corresponding to eigenvalues in  $\boldsymbol{\Lambda}_k^\perp = \text{diag}([\lambda_{k+1}, \dots, \lambda_r])$ . For any  $\mathbf{D} \in \mathbb{R}_*^{N \times k}$  that belongs to the horizontal space  $\mathcal{H}_{\mathbf{U}^*}\mathcal{M}$  at any  $\mathbf{U}^* \in \mathcal{U}^*$ , we have  $\mathbf{D}^\top \mathbf{U}^* = \mathbf{U}^{*\top} \mathbf{D}$ , which implies that

$$\langle \boldsymbol{\Omega}, \mathbf{U}^{*\top} \mathbf{D} \rangle = 0,$$

since  $\boldsymbol{\Omega}$  is a skew-symmetric matrix. Then, for  $\forall \mathbf{D} \in \mathcal{H}_{\mathbf{U}^*}\mathcal{M}$ , we have

$$\begin{aligned} \text{hess } g(\mathbf{U}^*)[\mathbf{D}, \mathbf{D}] &= \langle \nabla^2 g(\mathbf{U}^*)[\mathbf{D}], \mathbf{D} \rangle - \langle \mathbf{U}^* \boldsymbol{\Omega}, \mathbf{D} \rangle \\ &\stackrel{\textcircled{1}}{=} \langle \nabla^2 g(\mathbf{U}^*)[\mathbf{D}], \mathbf{D} \rangle \\ &= \langle (\mathbf{U}^* \mathbf{D}^\top + \mathbf{D} \mathbf{U}^{*\top}) \mathbf{U}^* + (\mathbf{U}^* \mathbf{U}^{*\top} - \mathbf{X}) \mathbf{D}, \mathbf{D} \rangle \\ &= \langle \mathbf{W}_k \boldsymbol{\Lambda}_k \mathbf{W}_k^\top, \mathbf{D} \mathbf{D}^\top \rangle + \langle \mathbf{Q} \boldsymbol{\Lambda}_k \mathbf{Q}^\top, \mathbf{D}^\top \mathbf{D} \rangle - \langle \mathbf{W}_k^\perp \boldsymbol{\Lambda}_k^\perp \mathbf{W}_k^{\perp\top}, \mathbf{D} \mathbf{D}^\top \rangle \\ &\stackrel{\textcircled{2}}{\geq} \lambda_k \|\mathbf{D}\|_F^2 + \lambda_k \|\mathbf{D}\|_F^2 - \lambda_{k+1} \|\mathbf{D}\|_F^2 \\ &\stackrel{\textcircled{3}}{\geq} 1.91 \lambda_k \|\mathbf{D}\|_F^2. \end{aligned}$$

Here, ① follows from  $\langle \mathbf{U}^* \boldsymbol{\Omega}, \mathbf{D} \rangle = \langle \boldsymbol{\Omega}, \mathbf{U}^{*\top} \mathbf{D} \rangle = 0$ , ② follows from [11, Lemma 7], and ③ follows from the assumption  $\lambda_{k+1} \leq \frac{1}{12} \lambda_k$ . Then, we have

$$\lambda_{\min}(\text{hess } g(\mathbf{U}^*)) \geq 1.91 \lambda_k > 0, \quad (\text{D.2})$$

which also implies that any  $\mathbf{U}^* \in \mathcal{U}^*$  is a strict local minimum of  $g(\mathbf{U})$ .

Next, we characterize the strong convexity in region  $\mathcal{R}_1$ . Note that for  $\forall x_1, x_2 \in \mathbb{R}$ , we have  $x_1 - x_2 \geq -|x_1 - x_2|$ , i.e.,  $x_1 \geq x_2 - |x_1 - x_2|$ , which implies that

$$\text{hess } g(\mathbf{U})[\mathbf{D}, \mathbf{D}] \geq \text{hess } g(\mathbf{U}^*)[\mathbf{D}, \mathbf{D}] - |\text{hess } g(\mathbf{U})[\mathbf{D}, \mathbf{D}] - \text{hess } g(\mathbf{U}^*)[\mathbf{D}, \mathbf{D}]|, \quad (\text{D.3})$$

where  $\mathbf{D}$  belongs to the horizontal space  $\mathcal{H}_{\mathbf{U}} \mathcal{M}$  at any  $\mathbf{U} \in \mathcal{R}_1$ , i.e.,  $\mathbf{U}^\top \mathbf{D} = \mathbf{D}^\top \mathbf{U}$ . For notational simplicity, we denote  $\mathbf{U}^* \mathbf{P}^*$  with  $\mathbf{P}^* = \arg \min_{\mathbf{P} \in \mathcal{O}_k} \|\mathbf{U} - \mathbf{U}^* \mathbf{P}\|_F$  as  $\mathbf{U}^*$ . In the rest of this section, we bound the two terms in the right hand side of (D.3) in sequence.

**Term 1:** Note that  $\text{hess } g(\mathbf{U}^*)[\mathbf{D}]$  is the projection of  $\nabla^2 g(\mathbf{U}^*)[\mathbf{D}]$  onto the horizontal space  $\mathcal{H}_{\mathbf{U}} \mathcal{M}$ , namely,  $\text{hess } g(\mathbf{U}^*)[\mathbf{D}] = \nabla^2 g(\mathbf{U}^*)[\mathbf{D}] - \mathbf{U} \boldsymbol{\Omega}$  with  $\boldsymbol{\Omega}$  being a skew-symmetric matrix that solves the following Sylvester equation

$$\boldsymbol{\Omega} \mathbf{U}^\top \mathbf{U} + \mathbf{U}^\top \mathbf{U} \boldsymbol{\Omega} = \mathbf{U}^\top \nabla^2 g(\mathbf{U}^*)[\mathbf{D}] - \nabla^2 g(\mathbf{U}^*)[\mathbf{D}]^\top \mathbf{U}. \quad (\text{D.4})$$

Then, we have

$$\begin{aligned} \text{hess } g(\mathbf{U}^*)[\mathbf{D}, \mathbf{D}] &= \langle \nabla^2 g(\mathbf{U}^*)[\mathbf{D}], \mathbf{D} \rangle - \langle \mathbf{U} \boldsymbol{\Omega}, \mathbf{D} \rangle \\ &= \langle \nabla^2 g(\mathbf{U}^*)[\mathbf{D}], \mathbf{D} \rangle, \end{aligned} \quad (\text{D.5})$$

where the second line follows from  $\langle \mathbf{U} \boldsymbol{\Omega}, \mathbf{D} \rangle = \langle \boldsymbol{\Omega}, \mathbf{U}^\top \mathbf{D} \rangle$ ,  $\mathbf{U}^\top \mathbf{D} = \mathbf{D}^\top \mathbf{U}$  and  $\boldsymbol{\Omega} + \boldsymbol{\Omega}^\top = \mathbf{0}$ . Defining  $\mathbf{E}_u \triangleq \mathbf{U} - \mathbf{U}^*$ , together with  $\mathbf{U}^\top \mathbf{D} = \mathbf{D}^\top \mathbf{U}$ , we obtain

$$(\mathbf{U}^* + \mathbf{E}_u)^\top \mathbf{D} = \mathbf{D}^\top (\mathbf{U}^* + \mathbf{E}_u),$$

which further gives us

$$\mathbf{D}^\top \mathbf{U}^* = \mathbf{U}^{*\top} \mathbf{D} + \mathbf{E}_u^\top \mathbf{D} - \mathbf{D}^\top \mathbf{E}_u. \quad (\text{D.6})$$

By combining (D.5) and (D.6), we can bound the first term with

$$\begin{aligned} \text{hess } g(\mathbf{U}^*)[\mathbf{D}, \mathbf{D}] &= \langle \nabla^2 g(\mathbf{U}^*)[\mathbf{D}], \mathbf{D} \rangle \\ &= \langle (\mathbf{U}^* \mathbf{D}^\top + \mathbf{D} \mathbf{U}^{*\top}) \mathbf{U}^* + (\mathbf{U}^* \mathbf{U}^{*\top} - \mathbf{X}) \mathbf{D}, \mathbf{D} \rangle \\ &= \langle \mathbf{D}^\top \mathbf{U}^*, \mathbf{U}^{*\top} \mathbf{D} \rangle + \langle \mathbf{U}^{*\top} \mathbf{U}^*, \mathbf{D}^\top \mathbf{D} \rangle - \langle \mathbf{W}_k^\perp \boldsymbol{\Lambda}_k^\perp \mathbf{W}_k^{\perp\top}, \mathbf{D} \mathbf{D}^\top \rangle \\ &= \langle \mathbf{U}^{*\top} \mathbf{D} + \mathbf{E}_u^\top \mathbf{D} - \mathbf{D}^\top \mathbf{E}_u, \mathbf{U}^{*\top} \mathbf{D} \rangle + \langle \mathbf{Q} \boldsymbol{\Lambda}_k \mathbf{Q}^\top, \mathbf{D}^\top \mathbf{D} \rangle - \langle \mathbf{W}_k^\perp \boldsymbol{\Lambda}_k^\perp \mathbf{W}_k^{\perp\top}, \mathbf{D} \mathbf{D}^\top \rangle \\ &= \langle \mathbf{U}^* \mathbf{U}^{*\top}, \mathbf{D} \mathbf{D}^\top \rangle + \langle \mathbf{E}_u^\top \mathbf{D}, \mathbf{U}^{*\top} \mathbf{D} \rangle - \langle \mathbf{D}^\top \mathbf{E}_u, \mathbf{U}^{*\top} \mathbf{D} \rangle + \langle \mathbf{Q} \boldsymbol{\Lambda}_k \mathbf{Q}^\top, \mathbf{D}^\top \mathbf{D} \rangle - \langle \mathbf{W}_k^\perp \boldsymbol{\Lambda}_k^\perp \mathbf{W}_k^{\perp\top}, \mathbf{D} \mathbf{D}^\top \rangle \\ &\geq \lambda_k \|\mathbf{D}\|_F^2 - 0.2 \lambda_k \|\mathbf{D}\|_F^2 - 0.2 \lambda_k \|\mathbf{D}\|_F^2 + \lambda_k \|\mathbf{D}\|_F^2 - \frac{1}{12} \lambda_k \|\mathbf{D}\|_F^2 \\ &\geq 1.51 \lambda_k \|\mathbf{D}\|_F^2, \end{aligned}$$

where the first inequality follows from [11, Lemma 7], the Matrix Hölder Inequality [12], the assumption  $\lambda_{k+1} \leq \frac{1}{12} \lambda_k$ , and the following two inequalities

$$\begin{aligned} \langle \mathbf{E}_u^\top \mathbf{D}, \mathbf{U}^{*\top} \mathbf{D} \rangle &\geq -\|\mathbf{E}_u^\top \mathbf{D}\|_F \|\mathbf{U}^{*\top} \mathbf{D}\|_F \geq -\|\mathbf{E}_u\|_F \|\mathbf{U}^*\|_2 \|\mathbf{D}\|_F^2 \\ &\geq -0.2 \kappa^{-1} \sqrt{\lambda_k} \sqrt{\lambda_1} \|\mathbf{D}\|_F^2 = -0.2 \lambda_k \|\mathbf{D}\|_F^2, \end{aligned}$$

$$\begin{aligned} \langle \mathbf{D}^\top \mathbf{E}_u, \mathbf{U}^{*\top} \mathbf{D} \rangle &\leq \|\mathbf{D}^\top \mathbf{E}_u\|_F \|\mathbf{U}^{*\top} \mathbf{D}\|_F \leq \|\mathbf{E}_u\|_F \|\mathbf{U}^*\|_2 \|\mathbf{D}\|_F^2 \\ &\leq 0.2 \kappa^{-1} \sqrt{\lambda_k} \sqrt{\lambda_1} \|\mathbf{D}\|_F^2 = 0.2 \lambda_k \|\mathbf{D}\|_F^2. \end{aligned}$$

**Term 2:** By plugging  $\text{hess } g(\mathbf{U})[\mathbf{D}, \mathbf{D}] = \langle (\mathbf{U} \mathbf{D}^\top + \mathbf{D} \mathbf{U}^\top) \mathbf{U} + (\mathbf{U} \mathbf{U}^\top - \mathbf{X}) \mathbf{D}, \mathbf{D} \rangle$  and  $\text{hess } g(\mathbf{U}^*)[\mathbf{D}, \mathbf{D}] = \langle (\mathbf{U}^* \mathbf{D}^\top + \mathbf{D} \mathbf{U}^{*\top}) \mathbf{U}^* + (\mathbf{U}^* \mathbf{U}^{*\top} - \mathbf{X}) \mathbf{D}, \mathbf{D} \rangle$  into the second term, we

obtain

$$\begin{aligned}
& |\text{hess } g(\mathbf{U})[\mathbf{D}, \mathbf{D}] - \text{hess } g(\mathbf{U}^*)[\mathbf{D}, \mathbf{D}]| \\
&= |2\langle \mathbf{U}\mathbf{U}^\top - \mathbf{U}^*\mathbf{U}^{*\top}, \mathbf{D}\mathbf{D}^\top \rangle - \langle \mathbf{U}^*\mathbf{E}_u^\top, \mathbf{D}\mathbf{D}^\top \rangle + \langle \mathbf{D}^\top \mathbf{E}_u, \mathbf{U}^{*\top} \mathbf{D} \rangle + \langle \mathbf{U}^\top \mathbf{U} - \mathbf{U}^{*\top} \mathbf{U}^* \rangle| \\
&= |3\langle \mathbf{U}^{*\top} \mathbf{D}, \mathbf{E}_u^\top \mathbf{D} \rangle + 2\langle \mathbf{E}_u^\top \mathbf{D}, \mathbf{E}_u^\top \mathbf{D} \rangle + \langle \mathbf{D}^\top \mathbf{E}_u, \mathbf{U}^{*\top} \mathbf{D} \rangle + 2\langle \mathbf{D}\mathbf{E}_u^\top, \mathbf{D}\mathbf{U}^{*\top} \rangle + \langle \mathbf{D}\mathbf{E}_u^\top, \mathbf{D}\mathbf{E}_u^\top \rangle| \\
&\leq 6\|\mathbf{U}^*\|_2 \|\mathbf{E}_u\|_F \|\mathbf{D}\|_F^2 + 3\|\mathbf{E}_u\|_F^2 \|\mathbf{D}\|_F^2 \\
&\leq 1.2\lambda_k \|\mathbf{D}\|_F^2 + 0.12\kappa^{-2}\lambda \|\mathbf{D}\|_F^2 \\
&\leq 1.32\lambda_k \|\mathbf{D}\|_F^2,
\end{aligned}$$

where the first inequality follows from the Triangle Inequality and the Matrix Hölder Inequality [12], and the last two inequalities follow from  $\|\mathbf{U}^*\|_2 = \sqrt{\lambda_1}$  and  $\|\mathbf{E}_u\|_F \leq 0.2\kappa^{-1}\sqrt{\lambda_k}$  with  $\kappa \geq 1$ .

As a consequence, we have

$$\begin{aligned}
\text{hess } g(\mathbf{U})[\mathbf{D}, \mathbf{D}] &\geq \text{hess } g(\mathbf{U}^*)[\mathbf{D}, \mathbf{D}] - |\text{hess } g(\mathbf{U})[\mathbf{D}, \mathbf{D}] - \text{hess } g(\mathbf{U}^*)[\mathbf{D}, \mathbf{D}]| \\
&\geq 0.19\lambda_k \|\mathbf{D}\|_F^2,
\end{aligned}$$

which implies that

$$\lambda_{\min}(\text{hess } g(\mathbf{U})) \geq 0.19\lambda_k$$

holds for any  $\mathbf{U} \in \mathcal{R}_1$ . Thus, we finish the proof of property (2).

### D.3 Negative curvature in region $\mathcal{R}'_2$

For any  $\mathbf{U}_s^* \in \mathcal{U}_s^*$ , let  $\mathbf{U}_s^* = \mathbf{W}_s \mathbf{\Lambda}_s^{\frac{1}{2}} \mathbf{Q}^\top$  be an SVD of  $\mathbf{U}_s^*$  with  $\mathbf{W}_s \in \mathbb{R}^{N \times k}$ ,  $\mathbf{\Lambda}_s \in \mathbb{R}^{k \times k}$  and  $\mathbf{Q} \in \mathcal{O}_k$ . According to the definition of  $\mathcal{U}_s^*$ ,  $\mathbf{\Lambda}_s \in \mathbb{R}^{k \times k}$  contains any  $k$  non-zero eigenvalues of  $\mathbf{X}$  except the largest  $k$  eigenvalues. Denote  $\mathbf{\Lambda}_s = \text{diag}([\lambda_{s1}, \dots, \lambda_{sk}])$  with  $\lambda_{s1} \geq \dots \geq \lambda_{sk} > 0$ , we have  $\lambda_{sk} \leq \lambda_{k+1}$ . Let  $\mathbf{q}_k$  denote the  $k$ -th column of  $\mathbf{Q}$ .  $\mathbf{w}^* \in \mathbb{R}^N$  is one column chosen from  $\mathbf{W}_k$  satisfying  $\mathbf{w}^{*\top} \mathbf{W}_s = \mathbf{0}$ . Then, we show that the function  $g(\mathbf{U})$  at  $\mathbf{U}_s^*$  has directional negative curvature along the direction  $\mathbf{D} = \mathbf{w}^* \mathbf{q}_k^\top$ . Note that

$$\begin{aligned}
\mathbf{D}^\top \mathbf{U}_s^* &= \mathbf{q}_k \mathbf{w}^{*\top} \mathbf{U}_s^* = \mathbf{0}, \\
\mathbf{U}_s^{*\top} \mathbf{D} &= \mathbf{U}_s^{*\top} \mathbf{w}^* \mathbf{q}_k^\top = \mathbf{0},
\end{aligned}$$

which verifies that this direction  $\mathbf{D} = \mathbf{w}^* \mathbf{q}_k^\top$  belongs to the horizontal space  $\mathcal{H}_{\mathbf{U}_s^*} \mathcal{M}$  at  $\mathbf{U}_s^*$ . It can be seen that

$$\begin{aligned}
\text{hess } g(\mathbf{U}_s^*)[\mathbf{D}, \mathbf{D}] &= \langle (\mathbf{U}_s^* \mathbf{D}^\top + \mathbf{D} \mathbf{U}_s^{*\top}) \mathbf{U}_s^* + (\mathbf{U}_s^* \mathbf{U}_s^{*\top} - \mathbf{X}) \mathbf{D}, \mathbf{D} \rangle \\
&= \langle \mathbf{U}_s^{*\top} \mathbf{U}_s^*, \mathbf{D}^\top \mathbf{D} \rangle - \langle \mathbf{W}_s^\perp \mathbf{\Lambda}_s^\perp \mathbf{W}_s^{\perp\top}, \mathbf{D} \mathbf{D}^\top \rangle \\
&= \langle \mathbf{Q} \mathbf{\Lambda}_s \mathbf{Q}^\top, \mathbf{q}_k \mathbf{q}_k^\top \rangle - \langle \mathbf{W}_s^\perp \mathbf{\Lambda}_s^\perp \mathbf{W}_s^{\perp\top}, \mathbf{w}^* \mathbf{w}^{*\top} \rangle \\
&\leq \lambda_{sk} - \lambda_k \leq -0.91\lambda_k = -0.91\lambda_k \|\mathbf{D}\|_F^2,
\end{aligned}$$

where  $\mathbf{W}_s^\perp \in \mathbb{R}^{N \times (r-k)}$  is a matrix that contains eigenvectors of  $\mathbf{X}$  corresponding to eigenvalues in  $\mathbf{\Lambda}_s^\perp$ , i.e., eigenvalues of  $\mathbf{X}$  not contained in  $\mathbf{\Lambda}_s$ . The first inequality follows since  $\mathbf{w}^*$  is a column of both  $\mathbf{W}_s^\perp$  and  $\mathbf{W}_k$ . The second inequality follows from  $\lambda_{sk} \leq \lambda_{k+1} \leq \frac{1}{12}\lambda_k$ . Therefore, we have

$$\lambda_{\min}(\text{hess } g(\mathbf{U}_s^*)) \leq -0.91\lambda_k.$$

Next, we show that the function  $g(\mathbf{U})$  has directional negative curvature for any  $\mathbf{U} \in \mathcal{R}'_2$  along the direction

$$\mathbf{D} = \mathbf{U} - \mathbf{U}^* \mathbf{P}^* \text{ with } \mathbf{P}^* = \arg \min_{\mathbf{P} \in \mathcal{O}_k} \|\mathbf{U} - \mathbf{U}^* \mathbf{P}\|_F.$$

For notational simplicity, we still denote  $\mathbf{U}^* \mathbf{P}^*$  as  $\mathbf{U}^*$ , i.e.,  $\mathbf{D} = \mathbf{U} - \mathbf{U}^*$ . First, we need to verify that this direction belongs to the horizontal space  $\mathcal{H}_{\mathbf{U}} \mathcal{M}$  at  $\mathbf{U}$ . As is shown in [13, proof of Lemma 6],  $\mathbf{U}^\top \mathbf{U}^*$  is a symmetric PSD matrix. Then, we have

$$\mathbf{D}^\top \mathbf{U} = \mathbf{U}^\top \mathbf{U} - \mathbf{U}^{*\top} \mathbf{U} = \mathbf{U}^\top \mathbf{U} - \mathbf{U}^\top \mathbf{U}^* = \mathbf{U}^\top \mathbf{D},$$

which implies that  $\mathbf{D} \in \mathcal{H}_U \mathcal{M}$ .

Note that minimizing  $g(\mathbf{U})$  is equivalent to the following minimization problem

$$\min_{\mathbf{U} \in \mathbb{R}_*^{N \times k}} \frac{1}{2} \|\mathbf{U}\mathbf{U}^\top - \mathbf{U}^* \mathbf{U}^{*\top}\|_F^2 - \langle \mathbf{U}\mathbf{U}^\top, \mathbf{W}_k^\perp \mathbf{\Lambda}_k^\perp \mathbf{W}_k^{\perp\top} \rangle.$$

Define two functions  $g_1(\mathbf{U})$  and  $g_2(\mathbf{U})$  as

$$\begin{aligned} g_1(\mathbf{U}) &\triangleq \frac{1}{2} \|\mathbf{U}\mathbf{U}^\top - \mathbf{U}^* \mathbf{U}^{*\top}\|_F^2 - \langle \mathbf{U}\mathbf{U}^\top, \mathbf{W}_k^\perp \mathbf{\Lambda}_k^\perp \mathbf{W}_k^{\perp\top} \rangle, \\ g_2(\mathbf{U}) &\triangleq -\langle \mathbf{U}\mathbf{U}^\top, \mathbf{W}_k^\perp \mathbf{\Lambda}_k^\perp \mathbf{W}_k^{\perp\top} \rangle. \end{aligned}$$

Then, we have

$$\begin{aligned} \nabla g_2(\mathbf{U}) &= -2\mathbf{W}_k^\perp \mathbf{\Lambda}_k^\perp \mathbf{W}_k^{\perp\top} \mathbf{U}, \\ \nabla^2 g_2(\mathbf{U})[\mathbf{D}, \mathbf{D}] &= -2\langle \mathbf{W}_k^\perp \mathbf{\Lambda}_k^\perp \mathbf{W}_k^{\perp\top}, \mathbf{D}\mathbf{D}^\top \rangle. \end{aligned}$$

Together with [13, Lemma 7], we get

$$\begin{aligned} 2 \text{hess } g(\mathbf{U})[\mathbf{D}, \mathbf{D}] &= 2\nabla^2 g(\mathbf{U})[\mathbf{D}, \mathbf{D}] = \nabla^2 g_1(\mathbf{U})[\mathbf{D}, \mathbf{D}] \\ &= \|\mathbf{D}\mathbf{D}^\top\|_F^2 - 3\|\mathbf{U}\mathbf{U}^\top - \mathbf{U}^* \mathbf{U}^{*\top}\|_F^2 + 4\langle \nabla g_1(\mathbf{U}), \mathbf{D} \rangle + \nabla^2 g_2(\mathbf{U})[\mathbf{D}, \mathbf{D}] - 4\langle \nabla g_2(\mathbf{U}), \mathbf{D} \rangle, \end{aligned} \quad (\text{D.7})$$

where the first equality follows from  $\langle \mathbf{U}\mathbf{\Omega}, \mathbf{D} \rangle = 0$ , similar to Appendix D.3.

Note that the first two terms in (D.7) can be bounded with

$$\begin{aligned} &\|\mathbf{D}\mathbf{D}^\top\|_F^2 - 3\|\mathbf{U}\mathbf{U}^\top - \mathbf{U}^* \mathbf{U}^{*\top}\|_F^2 \\ &\leq -\|\mathbf{U}\mathbf{U}^\top - \mathbf{U}^* \mathbf{U}^{*\top}\|_F^2 \\ &\leq -2(\sqrt{2} - 1)\lambda_k \|\mathbf{D}\|_F^2 \\ &\leq -0.82\lambda_k \|\mathbf{D}\|_F^2 \end{aligned} \quad (\text{D.8})$$

by using Lemma 6 in [13].

Note that

$$\|\mathbf{D}\|_F = \|\mathbf{U} - \mathbf{U}^*\|_F \geq \|\text{diag}([\sigma_1(\mathbf{U}) - \sqrt{\lambda_1}, \dots, \sigma_k(\mathbf{U}) - \sqrt{\lambda_k}])\|_F \geq \sigma_k(\mathbf{U}) - \sqrt{\lambda_k} \geq \frac{1}{2}\sqrt{\lambda_k},$$

where the first inequality follows from [3, Theorem 5], and the last inequality follows from  $\sigma_k(\mathbf{U}) \leq \frac{1}{2}\sqrt{\lambda_k}$ . Then, the third term in (D.7) can be bounded with

$$\begin{aligned} \langle \nabla g_1(\mathbf{U}), \mathbf{D} \rangle &\leq \|\nabla g_1(\mathbf{U})\|_F \|\mathbf{D}\|_F = 2\|\text{grad } g(\mathbf{U})\|_F \|\mathbf{D}\|_F \\ &\leq \frac{1}{40}\lambda_k^{\frac{3}{2}} \|\mathbf{D}\|_F = \frac{1}{20}\lambda_k \|\mathbf{D}\|_F \frac{1}{2}\sqrt{\lambda_k} \leq \frac{1}{20}\lambda_k \|\mathbf{D}\|_F^2. \end{aligned} \quad (\text{D.9})$$

Next, we bound the last two terms in (D.7) with

$$\begin{aligned} &\nabla^2 g_2(\mathbf{U})[\mathbf{D}, \mathbf{D}] - 4\langle \nabla g_2(\mathbf{U}), \mathbf{D} \rangle \\ &= -2\langle \mathbf{W}_k^\perp \mathbf{\Lambda}_k^\perp \mathbf{W}_k^{\perp\top}, \mathbf{D}\mathbf{D}^\top \rangle + 8\langle \mathbf{W}_k^\perp \mathbf{\Lambda}_k^\perp \mathbf{W}_k^{\perp\top} \mathbf{U}, \mathbf{D} \rangle \\ &= 8\langle \mathbf{W}_k^\perp \mathbf{\Lambda}_k^\perp \mathbf{W}_k^{\perp\top} \mathbf{U}, \mathbf{U} - \mathbf{U}^* \rangle - 2\langle \mathbf{W}_k^\perp \mathbf{\Lambda}_k^\perp \mathbf{W}_k^{\perp\top}, \mathbf{U}\mathbf{U}^\top - \mathbf{U}^* \mathbf{U}^{\top} - \mathbf{U}\mathbf{U}^{*\top} + \mathbf{U}^* \mathbf{U}^{*\top} \rangle \\ &\stackrel{\textcircled{1}}{=} 6\langle \mathbf{W}_k^\perp \mathbf{\Lambda}_k^\perp \mathbf{W}_k^{\perp\top}, \mathbf{U}\mathbf{U}^\top \rangle = 6\langle \mathbf{\Lambda}_k^\perp, \mathbf{W}_k^{\perp\top} \mathbf{U}\mathbf{U}^\top \mathbf{W}_k^\perp \rangle \\ &\stackrel{\textcircled{2}}{\leq} 6\lambda_{k+1} \|\mathbf{W}_k^{\perp\top} \mathbf{U}\|_F^2 \stackrel{\textcircled{3}}{=} 6\lambda_{k+1} \|\mathbf{W}_k^{\perp\top} (\mathbf{U} - \mathbf{U}^*)\|_F^2 \\ &\leq \frac{1}{2}\lambda_k \|\mathbf{D}\|_F^2, \end{aligned} \quad (\text{D.10})$$

where  $\textcircled{1}$  and  $\textcircled{3}$  follow from  $\mathbf{W}_k^{\perp\top} \mathbf{U}^* = \mathbf{0}$ , and  $\textcircled{2}$  follows from [11, Lemma 7].

By plugging inequalities (D.8), (D.9) and (D.10) into (D.7), we obtain

$$\text{hess } g(\mathbf{U})[\mathbf{D}, \mathbf{D}] \leq -0.41\lambda_k \|\mathbf{D}\|_F^2 + 0.1\lambda_k \|\mathbf{D}\|_F^2 + 0.25\lambda_k \|\mathbf{D}\|_F^2 = -0.06\lambda_k \|\mathbf{D}\|_F^2,$$

which implies that

$$\lambda_{\min}(\text{hess } g(\mathbf{U})) \leq -0.06\lambda_k$$

holds for all  $\mathbf{U} \in \mathcal{R}'_2$ , and we finish the proof of property (3).



#### D.4 Large gradient in regions $\mathcal{R}_2''$ , $\mathcal{R}_3'$ and $\mathcal{R}_3''$

It is easy to see that the first inequality in property (4) is true due to the definition of  $\mathcal{R}_2''$ . In this section, we mainly focus on showing the gradient is large in regions  $\mathcal{R}_3'$  and  $\mathcal{R}_3''$ .

##### D.4.1 Large gradient in region $\mathcal{R}_3'$

To show  $\|\text{grad } g(\mathbf{U})\|_F$  is large for any  $\mathbf{U} \in \mathcal{R}_3'$ , we rewrite  $\mathbf{U}$  as

$$\mathbf{U} = \mathbf{W}_k \tilde{\mathbf{\Lambda}}_u^{\frac{1}{2}} \tilde{\mathbf{Q}}_u^\top + \tilde{\mathbf{E}}_u, \quad (\text{D.11})$$

where  $\mathbf{W}_k \in \mathbb{R}^{N \times k}$  contains the  $k$  eigenvectors of  $\mathbf{X}$  associated with the  $k$  largest eigenvalues of  $\mathbf{X}$ ,  $\tilde{\mathbf{\Lambda}}_u \in \mathbb{R}^{k \times k}$  is a diagonal matrix,  $\tilde{\mathbf{Q}}_u \in \mathcal{O}_k$  is an orthogonal matrix, and  $\tilde{\mathbf{E}}_u^\top \mathbf{W}_k = \mathbf{0}$ . Note that  $\mathbf{W}_k \tilde{\mathbf{\Lambda}}_u^{\frac{1}{2}} \tilde{\mathbf{Q}}_u^\top$  can be viewed as a compact SVD form of the projection of  $\mathbf{U}$  onto the column space of  $\mathbf{W}_k$ . Plugging (D.11) and (D.1) into  $\|\text{grad } g(\mathbf{U})\|_F^2$  gives

$$\begin{aligned} \|\text{grad } g(\mathbf{U})\|_F^2 &= \|(\mathbf{U}\mathbf{U}^\top - \mathbf{X})\mathbf{U}\|_F^2 \\ &= \|\mathbf{W}_k \tilde{\mathbf{\Lambda}}_u^{\frac{1}{2}} (\tilde{\mathbf{\Lambda}}_u - \mathbf{\Lambda}_k) \tilde{\mathbf{Q}}_u^\top + \mathbf{W}_k \tilde{\mathbf{\Lambda}}_u^{\frac{1}{2}} \tilde{\mathbf{Q}}_u^\top \tilde{\mathbf{E}}_u^\top \tilde{\mathbf{E}}_u + \tilde{\mathbf{E}}_u \tilde{\mathbf{Q}}_u \tilde{\mathbf{\Lambda}}_u \tilde{\mathbf{Q}}_u^\top + \tilde{\mathbf{E}}_u \tilde{\mathbf{E}}_u^\top \tilde{\mathbf{E}}_u - \mathbf{W}_k^\perp \mathbf{\Lambda}_k^\perp \mathbf{W}_k^{\perp\top} \tilde{\mathbf{E}}_u\|_F^2 \\ &= \|\tilde{\mathbf{E}}_u \mathbf{Q} \tilde{\mathbf{\Lambda}}_u \tilde{\mathbf{Q}}_u^\top + \tilde{\mathbf{E}}_u \tilde{\mathbf{E}}_u^\top \tilde{\mathbf{E}}_u - \mathbf{W}_k^\perp \mathbf{\Lambda}_k^\perp \mathbf{W}_k^{\perp\top} \tilde{\mathbf{E}}_u\|_F^2 + \|\mathbf{W}_k \tilde{\mathbf{\Lambda}}_u^{\frac{1}{2}} (\tilde{\mathbf{\Lambda}}_u - \mathbf{\Lambda}_k) \tilde{\mathbf{Q}}_u^\top + \mathbf{W}_k \tilde{\mathbf{\Lambda}}_u^{\frac{1}{2}} \tilde{\mathbf{Q}}_u^\top \tilde{\mathbf{E}}_u^\top \tilde{\mathbf{E}}_u\|_F^2, \end{aligned} \quad (\text{D.12})$$

where the last equality follows from  $\tilde{\mathbf{E}}_u^\top \mathbf{W}_k = \mathbf{0}$ . Next, we show at least one of the above two terms is large for any  $\mathbf{U} \in \mathcal{R}_3'$  by considering the following two cases.

**Case 1:**  $\|\tilde{\mathbf{E}}_u\|_F \geq 0.1\kappa^{-1}\sqrt{\lambda_k}$ . The square root of the first term in (D.12) can be bounded with

$$\begin{aligned} &\|\tilde{\mathbf{E}}_u \tilde{\mathbf{Q}}_u \tilde{\mathbf{\Lambda}}_u \tilde{\mathbf{Q}}_u^\top + \tilde{\mathbf{E}}_u \tilde{\mathbf{E}}_u^\top \tilde{\mathbf{E}}_u - \mathbf{W}_k^\perp \mathbf{\Lambda}_k^\perp \mathbf{W}_k^{\perp\top} \tilde{\mathbf{E}}_u\|_F \\ &\geq \|\tilde{\mathbf{E}}_u (\tilde{\mathbf{Q}}_u \tilde{\mathbf{\Lambda}}_u \tilde{\mathbf{Q}}_u^\top + \tilde{\mathbf{E}}_u^\top \tilde{\mathbf{E}}_u)\|_F - \|\mathbf{W}_k^\perp \mathbf{\Lambda}_k^\perp \mathbf{W}_k^{\perp\top} \tilde{\mathbf{E}}_u\|_F \\ &\stackrel{\textcircled{1}}{\geq} \sigma_k(\mathbf{U}^\top \mathbf{U}) \|\tilde{\mathbf{E}}_u\|_F - \lambda_{k+1} \|\tilde{\mathbf{E}}_u\|_F \\ &\stackrel{\textcircled{2}}{>} \frac{1}{6} \lambda_k \|\tilde{\mathbf{E}}_u\|_F \geq \frac{1}{60} \kappa^{-1} \lambda_k^{\frac{3}{2}} \end{aligned} \quad (\text{D.13})$$

where  $\textcircled{1}$  follows from  $\mathbf{U}^\top \mathbf{U} = \tilde{\mathbf{Q}}_u \tilde{\mathbf{\Lambda}}_u \tilde{\mathbf{Q}}_u^\top + \tilde{\mathbf{E}}_u^\top \tilde{\mathbf{E}}_u$  and [11, Corollary 2], and  $\textcircled{2}$  follows from  $\sigma_k(\mathbf{U}) > \frac{1}{2}\sqrt{\lambda_k}$  and the assumption  $\lambda_{k+1} \leq \frac{1}{12}\lambda_k$ .

**Case 2:**  $\|\tilde{\mathbf{E}}_u\|_F < 0.1\kappa^{-1}\sqrt{\lambda_k}$ . Denote  $\tilde{\lambda}_{ui}$  as the  $i$ -th diagonal entry of  $\tilde{\mathbf{\Lambda}}_u$  with  $\tilde{\lambda}_{u1} \geq \dots \geq \tilde{\lambda}_{uk}$ , i.e.,  $\sqrt{\tilde{\lambda}_{ui}}$  is the  $i$ -th singular value of  $\mathbf{W}_k \tilde{\mathbf{\Lambda}}_u^{\frac{1}{2}} \tilde{\mathbf{Q}}_u^\top$ . By using Weyl's inequality for the perturbation of singular values [14] and (D.11), we get

$$\sigma_k(\mathbf{U}) - \sqrt{\tilde{\lambda}_{uk}} \leq \|\tilde{\mathbf{E}}_u\|_2 \leq \|\tilde{\mathbf{E}}_u\|_F,$$

which further gives

$$\sqrt{\tilde{\lambda}_{uk}} \geq \sigma_k(\mathbf{U}) - \|\tilde{\mathbf{E}}_u\|_F > (0.5 - 0.1\kappa^{-1})\sqrt{\lambda_k}.$$

To bound the second term in (D.12), we still need a lower bound on  $\|\tilde{\mathbf{\Lambda}}_u - \mathbf{\Lambda}_k\|_F$ . Recall that  $\mathbf{Q} \in \mathcal{O}_k$  contains the right singular vectors of  $\mathbf{U}^*$ . According to the definition of  $\mathcal{R}_3'$ , we have

$$\begin{aligned} 0.2\kappa^{-1}\sqrt{\lambda_k} &< \min_{\mathbf{P} \in \mathcal{O}_k} \|\mathbf{U} - \mathbf{U}^* \mathbf{P}\|_F \leq \|\mathbf{U} - \mathbf{U}^* \mathbf{Q} \tilde{\mathbf{Q}}_u^\top\|_F \\ &= \|\mathbf{W}_k \tilde{\mathbf{\Lambda}}_u^{\frac{1}{2}} \tilde{\mathbf{Q}}_u^\top + \tilde{\mathbf{E}}_u - \mathbf{W}_k \mathbf{\Lambda}_k^{\frac{1}{2}} \tilde{\mathbf{Q}}_u^\top\|_F \leq \|\mathbf{W}_k (\tilde{\mathbf{\Lambda}}_u^{\frac{1}{2}} - \mathbf{\Lambda}_k^{\frac{1}{2}}) \tilde{\mathbf{Q}}_u^\top\|_F + \|\tilde{\mathbf{E}}_u\|_F \\ &= \|\tilde{\mathbf{\Lambda}}_u^{\frac{1}{2}} - \mathbf{\Lambda}_k^{\frac{1}{2}}\|_F + \|\tilde{\mathbf{E}}_u\|_F, \end{aligned}$$

which implies

$$\|\tilde{\mathbf{\Lambda}}_u^{\frac{1}{2}} - \mathbf{\Lambda}_k^{\frac{1}{2}}\|_F > 0.2\kappa^{-1}\sqrt{\lambda_k} - 0.1\kappa^{-1}\sqrt{\lambda_k} = 0.1\kappa^{-1}\sqrt{\lambda_k}.$$

Then, we can bound  $\|\tilde{\mathbf{\Lambda}}_u - \mathbf{\Lambda}_k\|_F$  with

$$\begin{aligned}
\|\tilde{\mathbf{\Lambda}}_u - \mathbf{\Lambda}_k\|_F &= \sqrt{\sum_{i=1}^k (\tilde{\lambda}_{ui} - \lambda_i)^2} = \sqrt{\sum_{i=1}^k (\sqrt{\tilde{\lambda}_{ui}} - \sqrt{\lambda_i})^2 (\sqrt{\tilde{\lambda}_{ui}} + \sqrt{\lambda_i})^2} \\
&\geq (\sqrt{\tilde{\lambda}_{uk}} + \sqrt{\lambda_k}) \sqrt{\sum_{i=1}^k (\sqrt{\tilde{\lambda}_{ui}} - \sqrt{\lambda_i})^2} \\
&> (1.5 - 0.1\kappa^{-1}) \sqrt{\lambda_k} \|\tilde{\mathbf{\Lambda}}_u^{\frac{1}{2}} - \mathbf{\Lambda}_k^{\frac{1}{2}}\|_F \\
&> 0.1\kappa^{-1} (1.5 - 0.1\kappa^{-1}) \lambda_k.
\end{aligned}$$

Now, we are ready to bound the square root of the second term in (D.12). In particular, we have

$$\begin{aligned}
&\|\mathbf{W}_k \tilde{\mathbf{\Lambda}}_u^{\frac{1}{2}} (\tilde{\mathbf{\Lambda}}_u - \mathbf{\Lambda}_k) \tilde{\mathbf{Q}}_u^\top + \mathbf{W}_k \tilde{\mathbf{\Lambda}}_u^{\frac{1}{2}} \tilde{\mathbf{Q}}_u^\top \tilde{\mathbf{E}}_u^\top \tilde{\mathbf{E}}_u\|_F \\
&\stackrel{\textcircled{1}}{=} \|\tilde{\mathbf{\Lambda}}_u^{\frac{1}{2}} [(\tilde{\mathbf{\Lambda}}_u - \mathbf{\Lambda}_k) \tilde{\mathbf{Q}}_u^\top + \tilde{\mathbf{Q}}_u^\top \tilde{\mathbf{E}}_u^\top \tilde{\mathbf{E}}_u]\|_F \\
&\stackrel{\textcircled{2}}{\geq} \sqrt{\tilde{\lambda}_{uk}} \|(\tilde{\mathbf{\Lambda}}_u - \mathbf{\Lambda}_k) \tilde{\mathbf{Q}}_u^\top + \tilde{\mathbf{Q}}_u^\top \tilde{\mathbf{E}}_u^\top \tilde{\mathbf{E}}_u\|_F \\
&\geq \sqrt{\tilde{\lambda}_{uk}} (\|\tilde{\mathbf{\Lambda}}_u - \mathbf{\Lambda}_k\|_F - \|\tilde{\mathbf{E}}_u\|_F^2) \\
&> (0.5 - 0.1\kappa^{-1}) \sqrt{\lambda_k} (0.1\kappa^{-1} (1.5 - 0.1\kappa^{-1}) \lambda_k - 0.01\kappa^{-2} \lambda_k) \\
&= (0.5 - 0.1\kappa^{-1}) (0.15\kappa^{-1} - 0.02\kappa^{-2}) \lambda_k^{\frac{3}{2}},
\end{aligned} \tag{D.14}$$

where ① follows from  $\mathbf{W}_k^\top \mathbf{W}_k = \mathbf{I}_k$ , and ② follows from [11, Corollary 2].

Note that

$$(0.5 - 0.1\kappa^{-1}) (0.15\kappa^{-1} - 0.02\kappa^{-2}) \geq \frac{1}{60} \kappa^{-1}$$

always holds for  $\kappa \geq 1$ . By combining (D.12), (D.13) and (D.14), we get

$$\|\text{grad } g(\mathbf{U})\|_F > \frac{1}{60} \kappa^{-1} \lambda_k^{\frac{3}{2}}.$$

Thus, we finish the proof of second inequality in property (4).

#### D.4.2 Large gradient in region $\mathcal{R}_3''$

For any  $\mathbf{U} \in \mathbb{R}_*^{N \times k}$ , denote  $\{\sigma_i\}_{i=1}^k$  as its singular values. Then, by using the Cauchy-Schwarz inequality, we have

$$\|\mathbf{U}\|_F^2 = \sum_{i=1}^k \sigma_i^2 \leq \sqrt{k} \sqrt{\sum_{i=1}^k \sigma_i^4} = \sqrt{k} \|\mathbf{U} \mathbf{U}^\top\|_F. \tag{D.15}$$

On one hand, we have

$$\langle \text{grad } g(\mathbf{U}), \mathbf{U} \rangle \leq \|\text{grad } g(\mathbf{U})\|_F \|\mathbf{U}\|_F \leq k^{\frac{1}{4}} \|\text{grad } g(\mathbf{U})\|_F \|\mathbf{U} \mathbf{U}^\top\|_F^{\frac{1}{2}}. \tag{D.16}$$

On the other hand, we have

$$\begin{aligned}
\langle \text{grad } g(\mathbf{U}), \mathbf{U} \rangle &= \langle (\mathbf{U} \mathbf{U}^\top - \mathbf{X}) \mathbf{U}, \mathbf{U} \rangle \\
&= \langle \mathbf{U} \mathbf{U}^\top - \mathbf{U}^* \mathbf{U}^{*\top}, \mathbf{U} \mathbf{U}^\top \rangle - \langle \mathbf{W}_k^\perp \mathbf{\Lambda}_k^\perp \mathbf{W}_k^{\perp\top}, \mathbf{U} \mathbf{U}^\top \rangle \\
&\stackrel{\textcircled{1}}{\geq} \|\mathbf{U} \mathbf{U}^\top\|_F^2 - \|\mathbf{U}^* \mathbf{U}^{*\top}\|_F \|\mathbf{U} \mathbf{U}^\top\|_F - \|\mathbf{W}_k^\perp \mathbf{\Lambda}_k^\perp \mathbf{W}_k^{\perp\top}\|_2 \|\mathbf{U} \mathbf{U}^\top\|_* \\
&\stackrel{\textcircled{2}}{>} \frac{1}{8} \|\mathbf{U} \mathbf{U}^\top\|_F^2 - \lambda_{k+1} \sqrt{k} \|\mathbf{U} \mathbf{U}^\top\|_F, \\
&\stackrel{\textcircled{3}}{>} \frac{1}{7} \|\mathbf{U} \mathbf{U}^\top\|_F \|\mathbf{U}^* \mathbf{U}^{*\top}\|_F - \frac{1}{12} \lambda_k \sqrt{k} \|\mathbf{U} \mathbf{U}^\top\|_F \\
&\geq \frac{1}{7} \sqrt{k} \lambda_k \|\mathbf{U} \mathbf{U}^\top\|_F - \frac{1}{12} \sqrt{k} \lambda_k \|\mathbf{U} \mathbf{U}^\top\|_F \\
&= \frac{5}{84} \sqrt{k} \lambda_k \|\mathbf{U} \mathbf{U}^\top\|_F
\end{aligned} \tag{D.17}$$

where ① follows from the Matrix Hölder Inequality [12], and ② and ③ follow from  $\|\mathbf{U}^* \mathbf{U}^{*\top}\|_F < \frac{7}{8} \|\mathbf{U} \mathbf{U}^\top\|_F$  and  $\lambda_{k+1} \leq \frac{1}{12} \lambda_k$ . Combining (D.16) and (D.17), we get

$$\|\text{grad } g(\mathbf{U})\|_F > \frac{5}{84} k^{\frac{1}{4}} \lambda_k \|\mathbf{U} \mathbf{U}^\top\|_F^{\frac{1}{2}} > \frac{5}{84} k^{\frac{1}{4}} \lambda_k \|\mathbf{U}^* \mathbf{U}^{*\top}\|_F^{\frac{1}{2}} \geq \frac{5}{84} k^{\frac{1}{4}} \lambda_k \|\mathbf{U}^*\|_2 \geq \frac{5}{84} k^{\frac{1}{4}} \lambda_k^{\frac{3}{2}},$$

where the second to last inequality follows from  $\|\mathbf{U}^* \mathbf{U}^{*\top}\|_F \geq \|\mathbf{U}^*\|_2^2$ . Thus, we finish the proof of the third inequality in property (4).

## E Proof of Lemma 3.2

We present the Riemannian gradient and Hessian of the empirical risk on the quotient manifold  $\mathcal{M}$  as follows

$$\begin{aligned} \text{grad } f(\mathbf{U}) &= \mathcal{P}_{\mathbf{U}}(\nabla f(\mathbf{U})) = \mathcal{A}^* \mathcal{A}(\mathbf{U} \mathbf{U}^\top - \mathbf{X}) \mathbf{U} \\ \text{hess } f(\mathbf{U})[\mathbf{D}, \mathbf{D}] &= \langle \mathcal{P}_{\mathbf{U}}(\nabla^2 f(\mathbf{U})[\mathbf{D}]), \mathbf{D} \rangle = \nabla^2 f(\mathbf{U})[\mathbf{D}, \mathbf{D}] - \langle \mathbf{U} \mathbf{\Omega}, \mathbf{D} \rangle = \nabla^2 f(\mathbf{U})[\mathbf{D}, \mathbf{D}] \end{aligned}$$

for any  $\mathbf{D} \in \mathcal{H}_{\mathbf{U}} \mathcal{M}$ . Here,  $\langle \mathbf{U} \mathbf{\Omega}, \mathbf{D} \rangle = \langle \mathbf{\Omega}, \mathbf{U}^\top \mathbf{D} \rangle = 0$  follows from the fact that  $\mathbf{\Omega}$  is a skew-symmetric matrix and  $\mathbf{D}^\top \mathbf{U} = \mathbf{U}^\top \mathbf{D}$ .

Denote  $\mathcal{B} : \mathbb{R}^{N \times N} \rightarrow \mathbb{R}^M$  as a linear operator with the  $m$ -th entry of the observation  $\mathbf{y} = \mathcal{B}(\mathbf{X})$  as  $\mathbf{y}_m = \langle \mathbf{B}_m, \mathbf{X} \rangle$ . According to the way we construct the symmetric linear operator  $\mathcal{A}$ , i.e.,  $\mathbf{A}_m = \frac{1}{2}(\mathbf{B}_m + \mathbf{B}_m^\top)$ , we have that

$$\|\mathcal{A}(\mathbf{Z})\|_2^2 = \sum_{m=1}^M \langle \mathbf{A}_m, \mathbf{Z} \rangle^2 = \sum_{m=1}^M \langle \mathbf{B}_m, \mathbf{Z} \rangle^2 = \|\mathcal{B}(\mathbf{Z})\|_2^2$$

holds for any symmetric matrix  $\mathbf{Z} \in \mathbb{R}^{N \times N}$ . Therefore, the constructed symmetric linear operator  $\mathcal{A}$  satisfies the RIP condition (3.4) as long as the linear operator  $\mathcal{B}$  satisfies the RIP condition (3.4).

Since the linear operator  $\mathcal{A}$  satisfies the RIP condition (3.4) for any matrix  $\mathbf{Z} \in \mathbb{R}^{N \times N}$  with rank at most  $r + k$ , we have

$$\|\mathcal{A}^* \mathcal{A}(\mathbf{Z}) - \mathbf{Z}\|_F \leq \delta_{r+k} \|\mathbf{Z}\|_F. \quad (\text{E.1})$$

To set the radius of the ball  $\mathcal{B}(l) = \{\mathbf{U} \in \mathbb{R}_*^{N \times k} : \|\mathbf{U} \mathbf{U}^\top\|_F \leq l\}$ , we first bound  $\|\text{grad } f(\mathbf{U})\|_F$  in  $\mathcal{R}_3''$ . On one hand, we have

$$\langle \text{grad } f(\mathbf{U}), \mathbf{U} \rangle \leq \|\text{grad } f(\mathbf{U})\|_F \|\mathbf{U}\|_F \leq k^{\frac{1}{4}} \|\text{grad } f(\mathbf{U})\|_F \|\mathbf{U} \mathbf{U}^\top\|_F^{\frac{1}{2}},$$

which follows from the Matrix Hölder Inequality [12] and (D.15). On the other hand, we have

$$\begin{aligned} &\langle \text{grad } f(\mathbf{U}), \mathbf{U} \rangle \\ &= \|\mathcal{A}(\mathbf{U} \mathbf{U}^\top)\|_2^2 - \langle \mathcal{A}(\mathbf{U}^* \mathbf{U}^{*\top}), \mathcal{A}(\mathbf{U} \mathbf{U}^\top) \rangle - \langle \mathcal{A}(\mathbf{W}_k^\perp \mathbf{\Lambda}_k^\perp \mathbf{W}_k^{\perp\top}), \mathcal{A}(\mathbf{U} \mathbf{U}^\top) \rangle \\ &\stackrel{\text{①}}{\geq} \|\mathcal{A}(\mathbf{U} \mathbf{U}^\top)\|_2^2 - \|\mathcal{A}(\mathbf{U}^* \mathbf{U}^{*\top})\|_2 \|\mathcal{A}(\mathbf{U} \mathbf{U}^\top)\|_2 - \|\mathcal{A}(\mathbf{W}_k^\perp \mathbf{\Lambda}_k^\perp \mathbf{W}_k^{\perp\top})\|_2 \|\mathcal{A}(\mathbf{U} \mathbf{U}^\top)\|_2 \\ &\stackrel{\text{②}}{\geq} (1 - \delta_{r+k}) \|\mathbf{U} \mathbf{U}^\top\|_F^2 - (1 + \delta_{r+k}) \|\mathbf{U}^* \mathbf{U}^{*\top}\|_F \|\mathbf{U} \mathbf{U}^\top\|_F - (1 + \delta_{r+k}) \|\mathbf{W}_k^\perp \mathbf{\Lambda}_k^\perp \mathbf{W}_k^{\perp\top}\|_F \|\mathbf{U} \mathbf{U}^\top\|_F \\ &\stackrel{\text{③}}{\geq} \frac{1}{7} (1 - 15\delta_{r+k}) \|\mathbf{U}^* \mathbf{U}^{*\top}\|_F \|\mathbf{U} \mathbf{U}^\top\|_F - (1 + \delta_{r+k}) \|\mathbf{W}_k^\perp \mathbf{\Lambda}_k^\perp \mathbf{W}_k^{\perp\top}\|_F \|\mathbf{U} \mathbf{U}^\top\|_F \\ &\stackrel{\text{④}}{\geq} \left( \frac{5}{84} - \frac{15}{7} \delta_{r+k} \right) \sqrt{k} \lambda_k \|\mathbf{U} \mathbf{U}^\top\|_F. \end{aligned}$$

Here, ① follows from the Hölder's Inequality. ② follows from the RIP condition in (3.4),  $\text{rank}(\mathbf{U} \mathbf{U}^\top) = \text{rank}(\mathbf{U}^* \mathbf{U}^{*\top}) = k \leq r + k$  and  $\text{rank}(\mathbf{W}_k^\perp \mathbf{\Lambda}_k^\perp \mathbf{W}_k^{\perp\top}) = r - k \leq k \leq r + k$ . ③ follows from  $\|\mathbf{U} \mathbf{U}^\top\|_F \geq \frac{8}{7} \|\mathbf{U}^* \mathbf{U}^{*\top}\|_F$ . ④ follows from  $\|\mathbf{U}^* \mathbf{U}^{*\top}\|_F = \|\mathbf{\Lambda}_k\|_F = \sqrt{\sum_{i=1}^k \lambda_i^2} \geq$

$\sqrt{k}\lambda_k$  and  $\|\mathbf{W}_k^\perp \mathbf{\Lambda}_k^\perp \mathbf{W}_k^\perp\|_F \leq \sqrt{k}\|\mathbf{W}_k^\perp \mathbf{\Lambda}_k^\perp \mathbf{W}_k^\perp\|_2 = \sqrt{k}\lambda_{k+1} \leq \frac{1}{12}\sqrt{k}\lambda_k$ . It follows that

$$\begin{aligned} \|\text{grad } f(\mathbf{U})\|_F &\geq k^{-\frac{1}{4}} \|\mathbf{U}\mathbf{U}^\top\|_F^{-\frac{1}{2}} \langle \text{grad } f(\mathbf{U}), \mathbf{U} \rangle \\ &\geq \left(\frac{5}{84} - \frac{15}{7}\delta_{r+k}\right) k^{\frac{1}{4}} \lambda_k \|\mathbf{U}\mathbf{U}^\top\|_F^{\frac{1}{2}} \\ &\geq \left(\frac{5}{84} - \frac{15}{7}\delta_{r+k}\right) k^{\frac{1}{4}} \lambda_k \|\mathbf{U}^* \mathbf{U}^{*\top}\|_F^{\frac{1}{2}} \\ &\geq \left(\frac{5}{84} - \frac{15}{7}\delta_{r+k}\right) k^{\frac{1}{4}} \lambda_k \|\mathbf{U}^*\|_2 \\ &\geq \left(\frac{5}{84} - \frac{15}{7}\delta_{r+k}\right) k^{\frac{1}{4}} \lambda_k^{\frac{3}{2}}. \end{aligned}$$

Then, we can conclude that  $\|\text{grad } f(\mathbf{U})\|_F \geq \left(\frac{5}{84} - \frac{15}{7}\delta_{r+k}\right) k^{\frac{1}{4}} \lambda_k^{\frac{3}{2}}$  holds when  $\|\mathbf{U}\mathbf{U}^\top\|_F \geq \frac{8}{7} \|\mathbf{U}^* \mathbf{U}^{*\top}\|_F$ . Therefore, we can set the radius of  $\mathcal{B}(l) = \{\mathbf{U} \in \mathbb{R}_*^{N \times k} : \|\mathbf{U}\mathbf{U}^\top\|_F \leq l\}$  as

$$l = \frac{8}{7} \|\mathbf{U}^* \mathbf{U}^{*\top}\|_F.$$

Inside the ball  $\mathcal{B}(l)$ , we then have

$$\begin{aligned} \|\text{grad } f(\mathbf{U}) - \text{grad } g(\mathbf{U})\|_F &= \|\mathcal{A}^* \mathcal{A}(\mathbf{U}\mathbf{U}^\top - \mathbf{X}) - (\mathbf{U}\mathbf{U}^\top - \mathbf{X})\|_F \|\mathbf{U}\|_F \\ &\leq \|\mathcal{A}^* \mathcal{A}(\mathbf{U}\mathbf{U}^\top - \mathbf{X}) - (\mathbf{U}\mathbf{U}^\top - \mathbf{X})\|_F \|\mathbf{U}\|_F \\ &\leq \delta_{r+k} \|\mathbf{U}\mathbf{U}^\top - \mathbf{X}\|_F k^{\frac{1}{4}} \sqrt{l} \\ &\leq \delta_{r+k} (l + \|\mathbf{X}\|_F) k^{\frac{1}{4}} \sqrt{l}, \end{aligned}$$

which implies that

$$\|\text{grad } f(\mathbf{U}) - \text{grad } g(\mathbf{U})\|_F \leq \frac{\epsilon}{2}$$

if  $\delta_{r+k} \leq \frac{\epsilon}{2(l + \|\mathbf{X}\|_F) k^{\frac{1}{4}} \sqrt{l}}$ . As a result, if the linear operator  $\mathcal{A}$  satisfies the RIP condition (3.4) with

$$\delta_{r+k} \leq \min \left\{ \frac{\epsilon}{2\sqrt{\frac{8}{7}} k^{\frac{1}{4}} \left(\frac{8}{7} \|\mathbf{U}^* \mathbf{U}^{*\top}\|_F + \|\mathbf{X}\|_F\right) \|\mathbf{U}^* \mathbf{U}^{*\top}\|_F^{\frac{1}{2}}}, \frac{1}{36} \right\},$$

the Assumption 2.2 is verified. Here, the term  $\frac{1}{36}$  comes from the requirement that  $\frac{15}{7}\delta_{r+k} < \frac{5}{84}$ .

To verify Assumption 2.3, it is enough to show that

$$|\text{hess } f(\mathbf{U})[\mathbf{D}, \mathbf{D}] - \text{hess } g(\mathbf{U})[\mathbf{D}, \mathbf{D}]| \leq \frac{\eta}{2}$$

holds for any  $\mathbf{D} \in \mathcal{H}_{\mathbf{U}} \mathcal{M}$  and  $\|\mathbf{D}\|_F = 1$ . Note that

$$\begin{aligned} &|\text{hess } f(\mathbf{U})[\mathbf{D}, \mathbf{D}] - \text{hess } g(\mathbf{U})[\mathbf{D}, \mathbf{D}]| \\ &= \left| \frac{1}{2} \|\mathcal{A}(\mathbf{U}\mathbf{D}^\top + \mathbf{D}\mathbf{U}^\top)\|_2^2 - \frac{1}{2} \|\mathbf{U}\mathbf{D}^\top + \mathbf{D}\mathbf{U}^\top\|_F^2 + \langle \mathcal{A}^* \mathcal{A}(\mathbf{U}\mathbf{U}^\top - \mathbf{X}), \mathbf{D}\mathbf{D}^\top \rangle - \langle \mathbf{U}\mathbf{U}^\top - \mathbf{X}, \mathbf{D}\mathbf{D}^\top \rangle \right| \\ &\leq \frac{1}{2} \left| \|\mathcal{A}(\mathbf{U}\mathbf{D}^\top + \mathbf{D}\mathbf{U}^\top)\|_2^2 - \|\mathbf{U}\mathbf{D}^\top + \mathbf{D}\mathbf{U}^\top\|_F^2 \right| + |\langle \mathcal{A}^* \mathcal{A}(\mathbf{U}\mathbf{U}^\top - \mathbf{X}) - (\mathbf{U}\mathbf{U}^\top - \mathbf{X}), \mathbf{D}\mathbf{D}^\top \rangle| \\ &\leq 2\delta_{r+k} \sqrt{k}l + \delta_{r+k} (l + \|\mathbf{X}\|_F) = \delta_{r+k} (2\sqrt{k}l + l + \|\mathbf{X}\|_F), \end{aligned}$$

where the last inequality follows from

$$\begin{aligned} &|\|\mathcal{A}(\mathbf{U}\mathbf{D}^\top + \mathbf{D}\mathbf{U}^\top)\|_2^2 - \|\mathbf{U}\mathbf{D}^\top + \mathbf{D}\mathbf{U}^\top\|_F^2| \\ &\leq \delta_{r+k} \|\mathbf{U}\mathbf{D}^\top + \mathbf{D}\mathbf{U}^\top\|_F^2 \leq 4\delta_{r+k} \|\mathbf{U}\|_F^2 \leq 4\delta_{r+k} \sqrt{k} \|\mathbf{U}\mathbf{U}^\top\|_F \leq 4\delta_{r+k} \sqrt{k}l \end{aligned}$$

and

$$\begin{aligned} &|\langle \mathcal{A}^* \mathcal{A}(\mathbf{U}\mathbf{U}^\top - \mathbf{X}) - (\mathbf{U}\mathbf{U}^\top - \mathbf{X}), \mathbf{D}\mathbf{D}^\top \rangle| \\ &\leq \|\mathcal{A}^* \mathcal{A}(\mathbf{U}\mathbf{U}^\top - \mathbf{X}) - (\mathbf{U}\mathbf{U}^\top - \mathbf{X})\|_F \|\mathbf{D}\mathbf{D}^\top\|_F \\ &\leq \delta_{r+k} (l + \|\mathbf{X}\|_F) \end{aligned}$$

by using the assumption that the linear operator  $\mathcal{A}$  satisfies the RIP condition (3.4) and the fact that  $\mathbf{U}\mathbf{D}^\top + \mathbf{D}\mathbf{U}^\top$  has rank at most  $2k$  with  $2k \leq r + k$ . Therefore, we can now conclude that Assumption 2.3 is verified as long as the linear operator  $\mathcal{A}$  satisfies the RIP condition (3.4) with

$$\delta_{r+k} \leq \frac{\eta}{2(\frac{16}{7}\sqrt{k}\|\mathbf{U}^\star\mathbf{U}^{\star\top}\|_F + \frac{8}{7}\|\mathbf{U}^\star\mathbf{U}^{\star\top}\|_F + \|\mathbf{X}\|_F)}.$$

### F Proof of Lemma 3.3

We first consider the critical point  $\mathbf{x} = \mathbf{0}$  and its neighborhood  $\mathcal{R}_1$ . Note that

$$\nabla^2 g(\mathbf{0}) = -4\mathbf{x}^\star\mathbf{x}^{\star\top} - 2\|\mathbf{x}^\star\|_2^2\mathbf{I}_N,$$

whose minimal eigenvalue and corresponding eigenvector are given as

$$\begin{aligned}\lambda_{\min}(\nabla^2 g(\mathbf{0})) &= -6\|\mathbf{x}^\star\|_2^2 < 0, \\ \mathbf{v}_{\min}(\mathbf{0}) &= \frac{\mathbf{x}^\star}{\|\mathbf{x}^\star\|_2}.\end{aligned}$$

Therefore,  $\mathbf{x} = \mathbf{0}$  is a strict saddle point. For any  $\mathbf{x} \in \mathcal{R}_1$ , we have  $\|\mathbf{x}\|_2 < \frac{1}{2}\|\mathbf{x}^\star\|_2$ . Denote  $\mathbf{v}_{\min}(\mathbf{x})$  as the eigenvector of  $\nabla^2 g(\mathbf{x})$  corresponding to the smallest eigenvalue  $\lambda_{\min}(\nabla^2 g(\mathbf{x}))$ . It follows that

$$\begin{aligned}\lambda_{\min}(\nabla^2 g(\mathbf{x})) &= \mathbf{v}_{\min}(\mathbf{x})^\top \nabla^2 g(\mathbf{x}) \mathbf{v}_{\min}(\mathbf{x}) \leq \mathbf{v}_{\min}(\mathbf{0})^\top \nabla^2 g(\mathbf{x}) \mathbf{v}_{\min}(\mathbf{0}) \\ &\stackrel{\textcircled{1}}{=} 12 \frac{1}{\|\mathbf{x}^\star\|_2^2} (\mathbf{x}^\top \mathbf{x}^\star)^2 + 6\|\mathbf{x}\|_2^2 - 6\|\mathbf{x}^\star\|_2^2 \\ &\stackrel{\textcircled{2}}{\leq} 18\|\mathbf{x}\|_2^2 - 6\|\mathbf{x}^\star\|_2^2 \stackrel{\textcircled{3}}{\leq} -\frac{3}{2}\|\mathbf{x}^\star\|_2^2,\end{aligned}$$

where ① follows by plugging  $\mathbf{v}_{\min}(\mathbf{0}) = \frac{\mathbf{x}^\star}{\|\mathbf{x}^\star\|_2}$  and  $\nabla^2 g(\mathbf{x}) = 12\mathbf{x}\mathbf{x}^\top - 4\mathbf{x}^\star\mathbf{x}^{\star\top} + 6\|\mathbf{x}\|_2^2\mathbf{I}_N - 2\|\mathbf{x}^\star\|_2^2\mathbf{I}_N$ . ② follows Cauchy-Schwarz inequality. ③ follows from  $\|\mathbf{x}\|_2 \leq \frac{1}{2}\|\mathbf{x}^\star\|_2$ .

Next, we consider the critical point  $\mathbf{x} = \mathbf{x}^\star$  and its neighborhood. The argument for another critical point  $\mathbf{x} = -\mathbf{x}^\star$  is similar so we omit the proof here. Note that

$$\nabla^2 g(\mathbf{x}^\star) = 8\mathbf{x}^\star\mathbf{x}^{\star\top} + 4\|\mathbf{x}^\star\|_2^2\mathbf{I}_N,$$

whose minimal eigenvalue is

$$\lambda_{\min}(\nabla^2 g(\mathbf{x}^\star)) = 4\|\mathbf{x}^\star\|_2^2 > 0$$

with the corresponding eigenvector satisfying  $\mathbf{v}_{\min}(\mathbf{x}^\star)^\top \mathbf{x}^\star = 0$ . Therefore,  $\mathbf{x} = \mathbf{x}^\star$  is a local minimum of  $g(\mathbf{x})$ . Moreover,  $g(\mathbf{x}^\star) = 0 = \min_{\mathbf{x}} g(\mathbf{x})$  further implies that  $\mathbf{x} = \mathbf{x}^\star$  is a global minimum. For any  $\mathbf{x} \in \mathcal{R}_2$ , we have  $\|\mathbf{x} - \mathbf{x}^\star\|_2 \leq \frac{1}{10}\|\mathbf{x}^\star\|_2$ . Denote  $\mathbf{v}_{\min}(\mathbf{x})$  as the eigenvector of  $\nabla^2 g(\mathbf{x})$  corresponding to the smallest eigenvalue  $\lambda_{\min}(\nabla^2 g(\mathbf{x}))$ . It follows that

$$\begin{aligned}\lambda_{\min}(\nabla^2 g(\mathbf{x})) &= \mathbf{v}_{\min}(\mathbf{x})^\top \nabla^2 g(\mathbf{x}) \mathbf{v}_{\min}(\mathbf{x}) \\ &= \mathbf{v}_{\min}(\mathbf{x})^\top \nabla^2 g(\mathbf{x}^\star) \mathbf{v}_{\min}(\mathbf{x}) - (\mathbf{v}_{\min}(\mathbf{x})^\top \nabla^2 g(\mathbf{x}^\star) \mathbf{v}_{\min}(\mathbf{x}) - \mathbf{v}_{\min}(\mathbf{x})^\top \nabla^2 g(\mathbf{x}) \mathbf{v}_{\min}(\mathbf{x})) \\ &\geq \mathbf{v}_{\min}(\mathbf{x})^\top \nabla^2 g(\mathbf{x}^\star) \mathbf{v}_{\min}(\mathbf{x}) - |\mathbf{v}_{\min}(\mathbf{x})^\top (\nabla^2 g(\mathbf{x}) - \nabla^2 g(\mathbf{x}^\star)) \mathbf{v}_{\min}(\mathbf{x})|.\end{aligned}$$

Then, we bound the two terms on the right hand side in sequence. For the first term, we have

$$\mathbf{v}_{\min}(\mathbf{x})^\top \nabla^2 g(\mathbf{x}^\star) \mathbf{v}_{\min}(\mathbf{x}) = 8(\mathbf{x}^\star^\top \mathbf{v}_{\min}(\mathbf{x}))^2 + 4\|\mathbf{x}^\star\|_2^2 \geq 4\|\mathbf{x}^\star\|_2^2.$$

Define  $\mathbf{e} = \mathbf{x} - \mathbf{x}^\star$ . For the second term, we have

$$\begin{aligned}&|\mathbf{v}_{\min}(\mathbf{x})^\top (\nabla^2 g(\mathbf{x}) - \nabla^2 g(\mathbf{x}^\star)) \mathbf{v}_{\min}(\mathbf{x})| \\ &= |24\mathbf{v}_{\min}(\mathbf{x})^\top \mathbf{x}^\star \mathbf{e}^\top \mathbf{v}_{\min}(\mathbf{x}) + 12(\mathbf{e}^\top \mathbf{v}_{\min}(\mathbf{x}))^2 + 12\mathbf{e}^\top \mathbf{x}^\star + 6\|\mathbf{e}\|_2^2| \\ &\leq 36\|\mathbf{x}^\star\|_2\|\mathbf{e}\|_2 + 18\|\mathbf{e}\|_2^2 \\ &\leq 3.78\|\mathbf{x}^\star\|_2^2,\end{aligned}$$

where the last two inequalities follow from the Cauchy-Schwarz inequality and  $\|e\|_2 \leq \frac{1}{10}\|\mathbf{x}^*\|_2$ . Therefore, we have

$$\lambda_{\min}(\nabla^2 g(\mathbf{x})) \geq 4\|\mathbf{x}^*\|_2^2 - 3.78\|\mathbf{x}^*\|_2^2 = 0.22\|\mathbf{x}^*\|_2^2.$$

Then, we consider the critical points  $\mathbf{x} = \frac{1}{\sqrt{3}}\|\mathbf{x}^*\|_2\mathbf{w}$ , with  $\mathbf{w}^\top \mathbf{x}^* = 0$ ,  $\|\mathbf{w}\|_2 = 1$  and its neighborhood  $\mathcal{R}_3$ . The argument for the other critical point  $\mathbf{x} = -\frac{1}{\sqrt{3}}\|\mathbf{x}^*\|_2\mathbf{w}$  is similar so we omit the proof here. Note that

$$\nabla^2 g\left(\frac{1}{\sqrt{3}}\|\mathbf{x}^*\|_2\mathbf{w}\right) = 4\|\mathbf{x}^*\|_2^2\mathbf{w}\mathbf{w}^\top - 4\mathbf{x}^*\mathbf{x}^{*\top},$$

whose minimal eigenvalue and corresponding eigenvector are given as

$$\begin{aligned}\lambda_{\min}(\nabla^2 g\left(\frac{1}{\sqrt{3}}\|\mathbf{x}^*\|_2\mathbf{w}\right)) &= -4\|\mathbf{x}^*\|_2^2 < 0, \\ \mathbf{v}_{\min}(\mathbf{0}) &= \frac{\mathbf{x}^*}{\|\mathbf{x}^*\|_2}.\end{aligned}$$

Therefore,  $\mathbf{x} = \frac{1}{\sqrt{3}}\|\mathbf{x}^*\|_2\mathbf{w}$  with  $\mathbf{w}^\top \mathbf{x}^* = 0$ ,  $\|\mathbf{w}\|_2 = 1$  are strict saddle points. For any  $\mathbf{x} \in \mathcal{R}_3$ , we have  $\|\mathbf{x} - \frac{1}{\sqrt{3}}\|\mathbf{x}^*\|_2\mathbf{w}\|_2 \leq \frac{1}{5}\|\mathbf{x}^*\|_2$ . Denote  $\mathbf{v}_{\min}(\mathbf{x})$  as the eigenvector of  $\nabla^2 g(\mathbf{x})$  corresponding to the smallest eigenvalue  $\lambda_{\min}(\nabla^2 g(\mathbf{x}))$ . It follows that

$$\begin{aligned}\lambda_{\min}(\nabla^2 g(\mathbf{x})) &= \mathbf{v}_{\min}(\mathbf{x})^\top \nabla^2 g(\mathbf{x}) \mathbf{v}_{\min}(\mathbf{x}) \leq \mathbf{v}_{\min}(\mathbf{0})^\top \nabla^2 g(\mathbf{x}) \mathbf{v}_{\min}(\mathbf{0}) \\ &\stackrel{\textcircled{1}}{=} 12 \frac{1}{\|\mathbf{x}^*\|_2^2} (\mathbf{x}^\top \mathbf{x}^*)^2 + 6\|\mathbf{x}\|_2^2 - 6\|\mathbf{x}^*\|_2^2 \stackrel{\textcircled{2}}{\leq} 18\|\mathbf{x}\|_2^2 - 6\|\mathbf{x}^*\|_2^2 \\ &= 18 \left\| \mathbf{x} - \frac{1}{\sqrt{3}}\|\mathbf{x}^*\|_2\mathbf{w} + \frac{1}{\sqrt{3}}\|\mathbf{x}^*\|_2\mathbf{w} \right\|_2^2 - 6\|\mathbf{x}^*\|_2^2 \\ &\leq 18 \left\| \mathbf{x} - \frac{1}{\sqrt{3}}\|\mathbf{x}^*\|_2\mathbf{w} \right\|_2^2 + \frac{1}{3}\|\mathbf{x}^*\|_2^2 + \frac{36}{\sqrt{3}} \left\| \mathbf{x} - \frac{1}{\sqrt{3}}\|\mathbf{x}^*\|_2\mathbf{w} \right\|_2 \|\mathbf{x}^*\|_2 - 6\|\mathbf{x}^*\|_2^2 \\ &\stackrel{\textcircled{3}}{\leq} -0.78\|\mathbf{x}^*\|_2^2,\end{aligned}$$

where ① follows by plugging  $\mathbf{v}_{\min}(\mathbf{0}) = \frac{\mathbf{x}^*}{\|\mathbf{x}^*\|_2}$  and  $\nabla^2 g(\mathbf{x}) = 12\mathbf{x}\mathbf{x}^\top - 4\mathbf{x}^*\mathbf{x}^{*\top} + 6\|\mathbf{x}\|_2^2\mathbf{I}_N - 2\|\mathbf{x}^*\|_2^2\mathbf{I}_N$ . ② follows from the Cauchy-Schwarz inequality. ③ follows from  $\|\mathbf{x} - \frac{1}{\sqrt{3}}\|\mathbf{x}^*\|_2\mathbf{w}\|_2 \leq \frac{1}{5}\|\mathbf{x}^*\|_2$ .

Finally, we show that the gradient  $\nabla g(\mathbf{x})$  has a sufficiently large norm when  $\mathbf{x} \in \mathcal{R}_4$ . Let  $\mathbf{x} = \alpha\mathbf{x}^* + \beta\|\mathbf{x}^*\|_2\mathbf{w}$  with  $\alpha, \beta \in \mathbb{R}$ ,  $\mathbf{w}^\top \mathbf{x}^* = 0$ , and  $\|\mathbf{w}\|_2 = 1$ . Then,  $\|\mathbf{x}\|_2 > \frac{1}{2}\|\mathbf{x}^*\|_2$ ,  $\min_{\gamma \in \{-1, 1\}} \|\mathbf{x} - \gamma\mathbf{x}^*\|_2 > \frac{1}{10}\|\mathbf{x}^*\|_2$  and  $\min_{\gamma \in \{1, -1\}} \left\| \mathbf{x} - \gamma \frac{1}{\sqrt{3}}\|\mathbf{x}^*\|_2\mathbf{w} \right\|_2 > \frac{1}{5}\|\mathbf{x}^*\|_2$  are equivalent to

$$\begin{cases} \alpha^2 + \beta^2 > \frac{1}{4}, \\ \min_{\gamma \in \{-1, 1\}} (\alpha - \gamma)^2 + \beta^2 > \frac{1}{100}, \\ \min_{\gamma \in \{-1, 1\}} \alpha^2 + \left(\beta - \frac{1}{\sqrt{3}}\gamma\right)^2 > \frac{1}{25}. \end{cases}$$

Note that

$$\begin{aligned}\|\nabla g(\mathbf{x})\|_2^2 &= \left\| 6\|\mathbf{x}\|_2^2\mathbf{x} - 2\|\mathbf{x}^*\|_2^2\mathbf{x} - 4(\mathbf{x}^{*\top}\mathbf{x})\mathbf{x}^* \right\|_2^2 \\ &= 4(9\alpha^2(\alpha^2 + \beta^2 - 1)^2 + \beta^2(3\alpha^2 + 3\beta^2 - 1)^2) \|\mathbf{x}^*\|_2^6 \\ &> 0.1571\|\mathbf{x}^*\|_2^6.\end{aligned}$$

Then, we have

$$\|\nabla g(\mathbf{x})\|_2 > 0.3963\|\mathbf{x}^*\|_2^3.$$

## G Proof of Lemma 3.4

The gradient and Hessian of the empirical risk (1.1) are given as

$$\begin{aligned}\nabla f(\mathbf{x}) &= \frac{2}{M} \sum_{m=1}^M (\mathbf{a}_m \langle \mathbf{a}_m, \mathbf{x} \rangle^3 - \mathbf{a}_m \langle \mathbf{a}_m, \mathbf{x} \rangle \langle \mathbf{a}_m, \mathbf{x}^* \rangle^2), \\ \nabla^2 f(\mathbf{x}) &= \frac{2}{M} \sum_{m=1}^M (3\mathbf{a}_m \mathbf{a}_m^\top \langle \mathbf{a}_m, \mathbf{x} \rangle^2 - \mathbf{a}_m \mathbf{a}_m^\top \langle \mathbf{a}_m, \mathbf{x}^* \rangle^2).\end{aligned}$$

Observe that

$$\begin{aligned}& \|\nabla f(\mathbf{x}) - \nabla g(\mathbf{x})\|_2 \\ &= 2 \left\| \frac{1}{M} \sum_{m=1}^M \mathbf{a}_m \langle \mathbf{a}_m, \mathbf{x} \rangle^3 - 3\|\mathbf{x}\|_2^2 \mathbf{x} - \frac{1}{M} \sum_{m=1}^M \mathbf{a}_m \langle \mathbf{a}_m, \mathbf{x} \rangle \langle \mathbf{a}_m, \mathbf{x}^* \rangle^2 + \|\mathbf{x}^*\|_2^2 \mathbf{x} + 2(\mathbf{x}^{*\top} \mathbf{x}) \mathbf{x}^* \right\|_2 \\ &\leq 2 \left\| \frac{1}{M} \sum_{m=1}^M \mathbf{a}_m \langle \mathbf{a}_m, \mathbf{x} \rangle^3 - 3\|\mathbf{x}\|_2^2 \mathbf{x} \right\|_2 + 2 \left\| \frac{1}{M} \sum_{m=1}^M \mathbf{a}_m \langle \mathbf{a}_m, \mathbf{x} \rangle \langle \mathbf{a}_m, \mathbf{x}^* \rangle^2 - \|\mathbf{x}^*\|_2^2 \mathbf{x} - 2(\mathbf{x}^{*\top} \mathbf{x}) \mathbf{x}^* \right\|_2.\end{aligned}$$

To bound the above two terms, we need the following lemma, which is a direct result from [15, Claim 5] by setting  $\mathbf{A} = \mathbf{I}_N$  and  $k = d = N$ .

**Lemma G.1.** *Suppose  $\mathbf{a}_m \in \mathbb{R}^N$  is a Gaussian random vector with entries satisfying  $\mathcal{N}(0, 1)$ . Denote  $\mathbf{a}_m^{\otimes 4} = \mathbf{a}_m \otimes \mathbf{a}_m \otimes \mathbf{a}_m \otimes \mathbf{a}_m \in \mathbb{R}^{N \times N \times N \times N}$  as a fourth order tensor. Then, we have*

$$\left\| \frac{1}{M} \sum_{m=1}^M (\mathbf{a}_m^{\otimes 4} - \mathbb{E} \mathbf{a}_m^{\otimes 4}) \right\|_2 \leq \tilde{\mathcal{O}} \left( \frac{N^2}{M} + \sqrt{\frac{N}{M}} \right) \triangleq h(N, M)$$

holds with probability at least  $1 - e^{-CN \log(M)}$ .

For the first term, we have

$$\begin{aligned}& 2 \left\| \frac{1}{M} \sum_{m=1}^M \mathbf{a}_m \langle \mathbf{a}_m, \mathbf{x} \rangle^3 - 3\|\mathbf{x}\|_2^2 \mathbf{x} \right\|_2 \\ &= 2 \left\| \frac{1}{M} \sum_{m=1}^M (\mathbf{a}_m^{\otimes 4} - \mathbb{E} \mathbf{a}_m^{\otimes 4}) \times_1 \mathbf{x} \times_2 \mathbf{x} \times_3 \mathbf{x} \right\|_2 \\ &\leq 2 \left\| \frac{1}{M} \sum_{m=1}^M (\mathbf{a}_m^{\otimes 4} - \mathbb{E} \mathbf{a}_m^{\otimes 4}) \right\|_2 \|\mathbf{x}\|_2^3 \\ &\leq 2h(N, M)l^3,\end{aligned}$$

where the last inequality follows from Lemma G.1 and  $\|\mathbf{x}\|_2 \leq l$ .

For the second term, we have

$$\begin{aligned}& 2 \left\| \frac{1}{M} \sum_{m=1}^M \mathbf{a}_m \langle \mathbf{a}_m, \mathbf{x} \rangle \langle \mathbf{a}_m, \mathbf{x}^* \rangle^2 - \|\mathbf{x}^*\|_2^2 \mathbf{x} - 2(\mathbf{x}^{*\top} \mathbf{x}) \mathbf{x}^* \right\|_2 \\ &= 2 \left\| \frac{1}{M} \sum_{m=1}^M (\mathbf{a}_m^{\otimes 4} - \mathbb{E} \mathbf{a}_m^{\otimes 4}) \times_1 \mathbf{x} \times_2 \mathbf{x}^* \times_3 \mathbf{x}^* \right\|_2 \\ &\leq 2 \left\| \frac{1}{M} \sum_{m=1}^M (\mathbf{a}_m^{\otimes 4} - \mathbb{E} \mathbf{a}_m^{\otimes 4}) \right\|_2 \|\mathbf{x}\|_2 \|\mathbf{x}^*\|_2^2 \\ &\leq 2h(N, M)l \|\mathbf{x}^*\|_2^2,\end{aligned}$$

where the last inequality follows from Lemma G.1 and  $\|\mathbf{x}\|_2 \leq l$ .

Therefore, we have that

$$\|\nabla f(\mathbf{x}) - \nabla g(\mathbf{x})\|_2 \leq 2h(N, M)l(l^2 + \|\mathbf{x}^*\|_2^2) \leq \frac{\epsilon}{2}$$

holds with probability at least  $1 - e^{-CN \log(M)}$  if

$$h(N, M) \leq \frac{\epsilon}{4l(l^2 + \|\mathbf{x}^*\|_2^2)}. \quad (\text{G.1})$$

As is stated in Lemma 3.3, we have shown that  $\|\nabla g(\mathbf{x})\|_2 \geq \epsilon$  in  $\mathcal{R}_4$ . Set the radius of the ball  $\mathcal{B}^N(l) \triangleq \{\mathbf{x} \in \mathbb{R}^N : \|\mathbf{x}\|_2 \leq l\}$  as  $l = 1.1\|\mathbf{x}^*\|_2$ . It can be seen that the region outside the ball  $\mathcal{B}^N(l)$  is a subset of  $\mathcal{R}_4$ . Thus, we still have  $\|\nabla g(\mathbf{x})\|_2 \geq \epsilon$  when  $\mathbf{x} \notin \mathcal{B}^N(l)$ . Then, for any  $\mathbf{x} \notin \mathcal{B}^N(l)$ , we have that

$$\begin{aligned} \|\nabla f(\mathbf{x})\|_2 &= \|\nabla g(\mathbf{x}) + (\nabla f(\mathbf{x}) - \nabla g(\mathbf{x}))\|_2 \\ &\geq \|\nabla g(\mathbf{x})\|_2 - \|\nabla f(\mathbf{x}) - \nabla g(\mathbf{x})\|_2 \geq \frac{\epsilon}{2} \end{aligned}$$

holds with probability at least  $1 - e^{-CN \log(M)}$ . Here, we have used  $\|\nabla f(\mathbf{x}) - \nabla g(\mathbf{x})\|_2 \leq \frac{\epsilon}{2}$  with high probability and  $\|\nabla g(\mathbf{x})\|_2 \geq \epsilon$ .

Since  $f(\mathbf{x})$  has a large gradient when  $\mathbf{x} \notin \mathcal{B}^N(l)$  with  $l = 1.1\|\mathbf{x}^*\|_2$ , we only need to consider the geometry of  $f(\mathbf{x})$  with  $\mathbf{x} \in \mathcal{B}^N(l)$ . Then, by plugging  $l = 1.1\|\mathbf{x}^*\|_2$  and  $\epsilon = 0.3963\|\mathbf{x}^*\|_2^3$  into (G.1), we get

$$h(N, M) \leq 0.0407.$$

Similarly, we can show that

$$\begin{aligned} &\|\nabla^2 f(\mathbf{x}) - \nabla^2 g(\mathbf{x})\|_2 \\ &\leq 6 \left\| \frac{1}{M} \sum_{m=1}^M (\mathbf{a}_m^{\otimes 4} - \mathbb{E} \mathbf{a}_m^{\otimes 4}) \times_1 \mathbf{x} \times_2 \mathbf{x} \right\|_2 + 2 \left\| \frac{1}{M} \sum_{m=1}^M (\mathbf{a}_m^{\otimes 4} - \mathbb{E} \mathbf{a}_m^{\otimes 4}) \times_1 \mathbf{x}^* \times_2 \mathbf{x}^* \right\|_2 \\ &\leq 6 \left\| \frac{1}{M} \sum_{m=1}^M (\mathbf{a}_m^{\otimes 4} - \mathbb{E} \mathbf{a}_m^{\otimes 4}) \right\|_2 \|\mathbf{x}\|_2^2 + 2 \left\| \frac{1}{M} \sum_{m=1}^M (\mathbf{a}_m^{\otimes 4} - \mathbb{E} \mathbf{a}_m^{\otimes 4}) \right\|_2 \|\mathbf{x}^*\|_2^2 \\ &\leq 2h(N, M)(3l^2 + \|\mathbf{x}^*\|_2^2) \leq \frac{\eta}{2} \end{aligned}$$

holds with probability at least  $1 - e^{-CN \log(M)}$  if

$$h(N, M) \leq \frac{\eta}{4(3l^2 + \|\mathbf{x}^*\|_2^2)}. \quad (\text{G.2})$$

Plugging  $l = 1.1\|\mathbf{x}^*\|_2$  and  $\eta = 0.22\|\mathbf{x}^*\|_2^2$  into (G.2), we get

$$h(N, M) \leq 0.0118.$$

## References

- [1] S. Mei, Y. Bai, and A. Montanari, “The landscape of empirical risk for non-convex losses,” *arXiv preprint arXiv:1607.06534*, 2016.
- [2] J. Nash, “The imbedding problem for riemannian manifolds,” *Annals of Mathematics*, pp. 20–63, 1956.
- [3] L. Mirsky, “Symmetric gauge functions and unitarily invariant norms,” *The Quarterly Journal of Mathematics*, vol. 11, no. 1, pp. 50–59, 1960.
- [4] B. A. Dubrovin, A. T. Fomenko, and S. P. Novikov, *Modern geometry-methods and applications: Part II: The geometry and topology of manifolds*, vol. 104. Springer Science & Business Media, 2012.



- [5] P.-A. Absil, R. Mahony, and R. Sepulchre, *Optimization algorithms on matrix manifolds*. Princeton University Press, 2009.
- [6] J.-P. Brasselet, J. Seade, and T. Suwa, *Vector fields on singular varieties*, vol. 1987. Springer Science & Business Media, 2009.
- [7] J. Zhang and S. Zhang, “A cubic regularized newton’s method over riemannian manifolds,” *arXiv preprint arXiv:1805.05565*, 2018.
- [8] Y. Nesterov and B. T. Polyak, “Cubic regularization of newton method and its global performance,” *Mathematical Programming*, vol. 108, no. 1, pp. 177–205, 2006.
- [9] N. Agarwal, N. Boumal, B. Bullins, and C. Cartis, “Adaptive regularization with cubics on manifolds,” *arXiv preprint arXiv:1806.00065*, 2018.
- [10] C. Eckart and G. Young, “The approximation of one matrix by another of lower rank,” *Psychometrika*, vol. 1, no. 3, pp. 211–218, 1936.
- [11] Z. Zhu, Q. Li, G. Tang, and M. B. Wakin, “The global optimization geometry of low-rank matrix optimization,” *arXiv preprint arXiv:1703.01256*, 2017.
- [12] B. Baumgartner, “An inequality for the trace of matrix products, using absolute values,” *arXiv preprint arXiv:1106.6189*, 2011.
- [13] R. Ge, C. Jin, and Y. Zheng, “No spurious local minima in nonconvex low rank problems: A unified geometric analysis,” in *Proceedings of the 34th International Conference on Machine Learning-Volume 70*, pp. 1233–1242, 2017.
- [14] R. A. Horn and C. R. Johnson, *Matrix analysis*. Cambridge University Press, 2012.
- [15] A. Anandkumar, R. Ge, and M. Janzamin, “Sample complexity analysis for learning over-complete latent variable models through tensor methods,” *arXiv preprint arXiv:1408.0553*, 2014.
